# Supplementary material for: Influence of Funneliformis mosseae enhanced with titanium dioxide nanoparticles (TiO2NPs) on Phaseolus vulgaris L. under salinity stress
Source: PubMed Central journal article supplement (PMC7446817; doi:10.1371/journal.pone.0235355), 2020-08-20

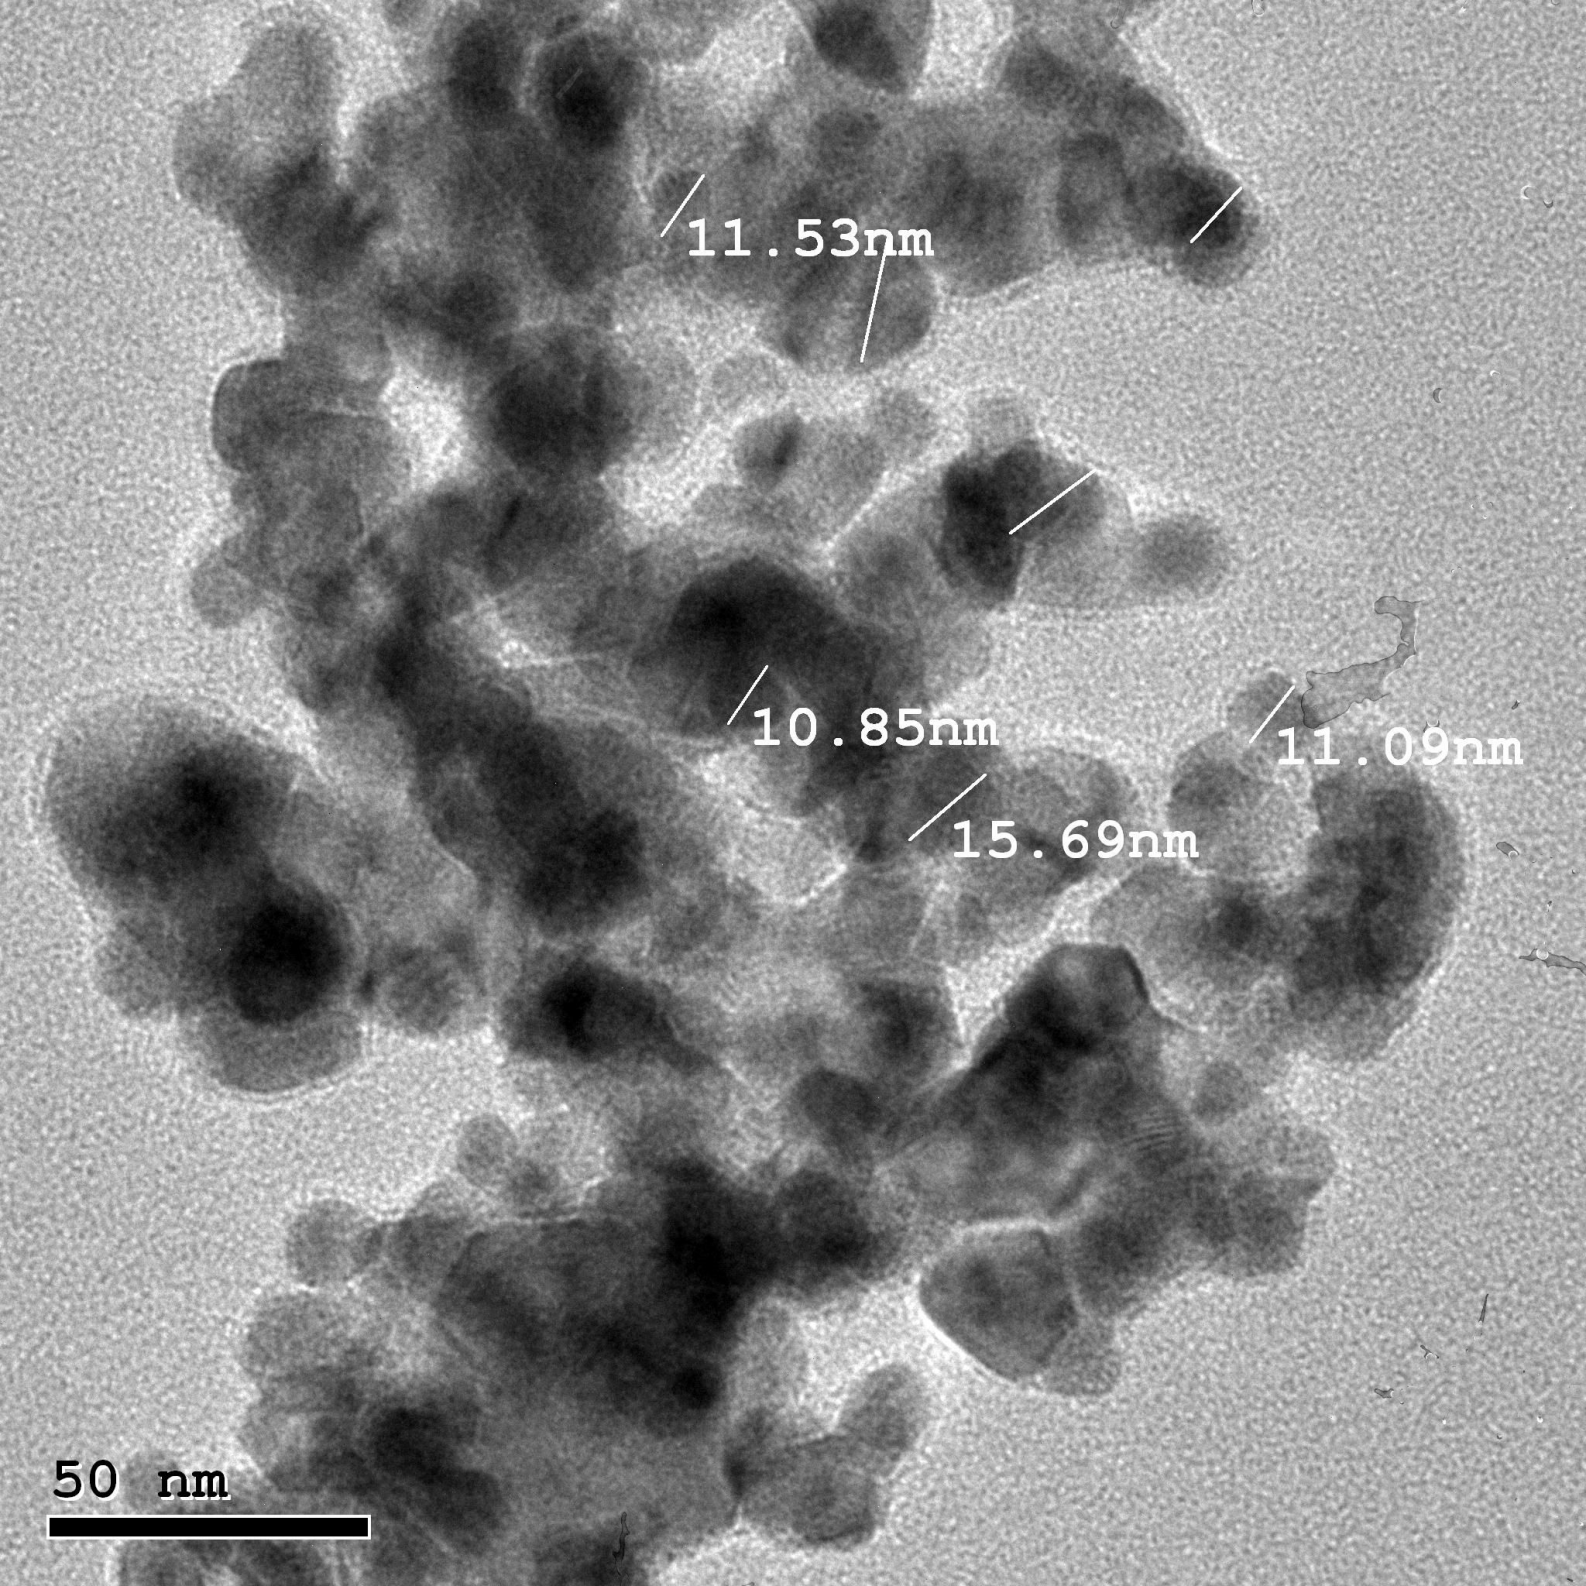

11.53nm

10.85nm

11.09nm

15.69nm

50 nm

X Number Record 93: 4, Nashwa 3

|         |        |
|---------|--------|
| 0.4     | 0      |
| 0.463   | 0      |
| 0.536   | 0      |
| 0.621   | 0      |
| 0.719   | 0      |
| 0.833   | 0      |
| 0.965   | 0      |
| 1.117   | 0      |
| 1.294   | 0      |
| 1.499   | 0      |
| 1.736   | 0      |
| 2.01    | 0      |
| 2.328   | 0      |
| 2.696   | 0      |
| 3.122   | 0      |
| 3.615   | 0      |
| 4.187   | 0      |
| 4.849   | 0      |
| 5.615   | 0      |
| 6.503   | 0      |
| 7.531   | 0      |
| 8.721   | 0      |
| 10.1    | 0      |
| 11.696  | 0      |
| 13.545  | 0      |
| 15.686  | 0      |
| 18.166  | 0      |
| 21.037  | 0      |
| 24.363  | 0      |
| 28.214  | 0      |
| 32.674  | 0      |
| 37.84   | 0      |
| 43.821  | 0      |
| 50.748  | 11.903 |
| 58.771  | 33.19  |
| 68.061  | 33.868 |
| 78.82   | 16.117 |
| 91.28   | 3.877  |
| 105.709 | 0.34   |
| 122.42  | 0      |
| 141.772 | 0      |
| 164.183 | 0      |
| 190.137 | 0      |
| 220.194 | 0.005  |
| 255.002 | 0.055  |
| 295.312 | 0.159  |

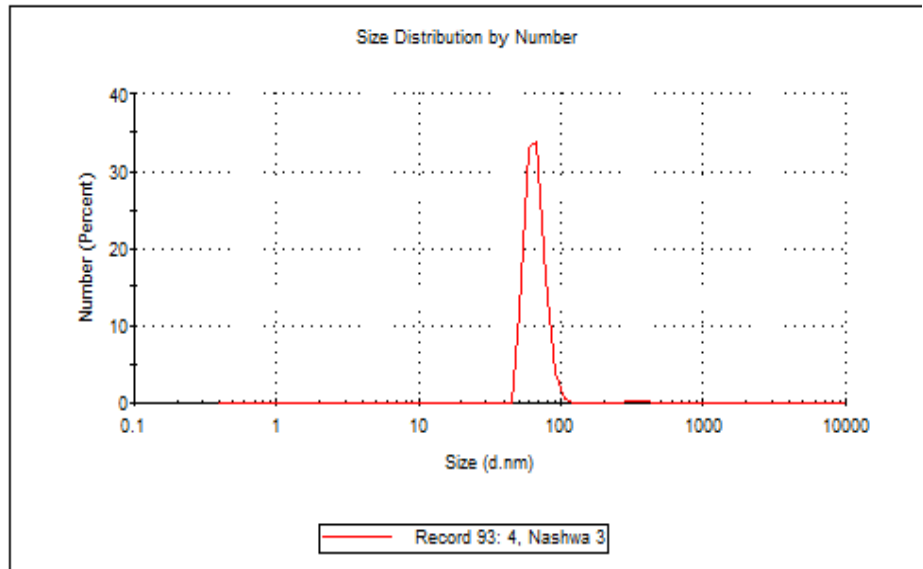

|          |       |
|----------|-------|
| 341.995  | 0.219 |
| 396.058  | 0.173 |
| 458.666  | 0.079 |
| 531.172  | 0.017 |
| 615.139  | 0     |
| 712.379  | 0     |
| 824.992  | 0     |
| 955.406  | 0     |
| 1106.435 | 0     |
| 1281.34  | 0     |
| 1483.893 | 0     |
| 1718.466 | 0     |
| 1990.119 | 0     |
| 2304.716 | 0     |
| 2669.043 | 0     |
| 3090.964 | 0     |
| 3579.581 | 0     |
| 4145.438 | 0     |
| 4800.746 | 0     |
| 5559.644 | 0     |
| 6438.508 | 0     |
| 7456.302 | 0     |
| 8634.988 | 0     |
| 10000    | 0     |

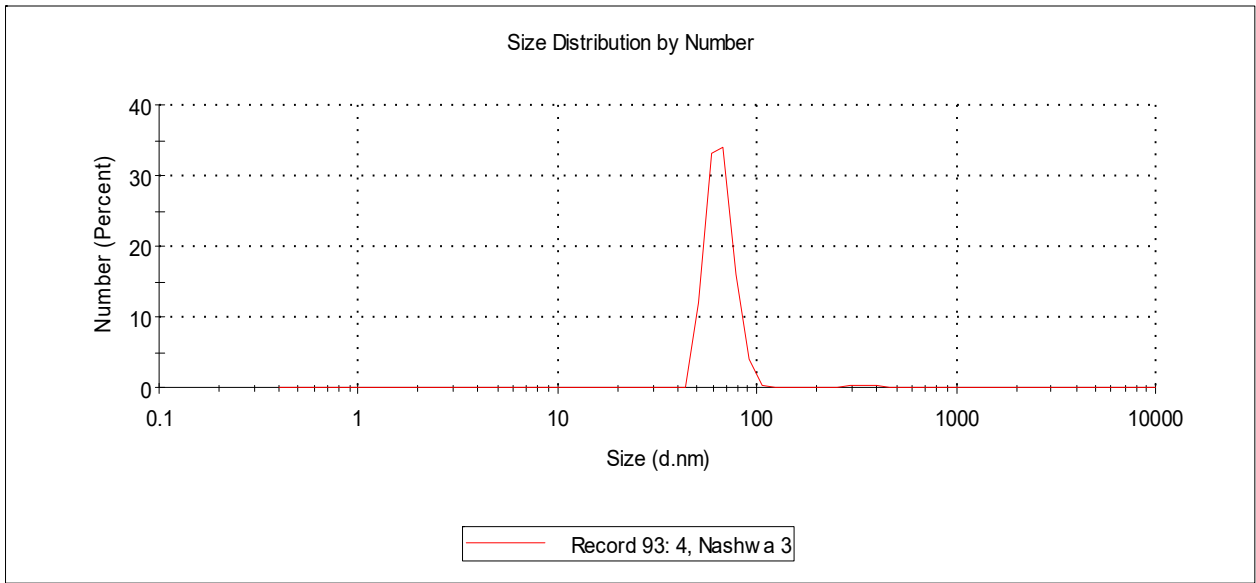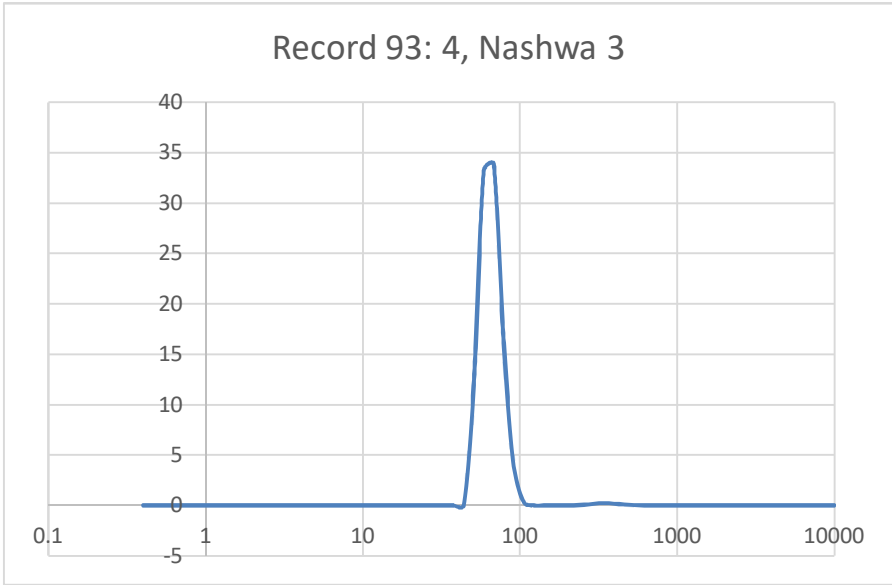

### Peak Find - Memory-68

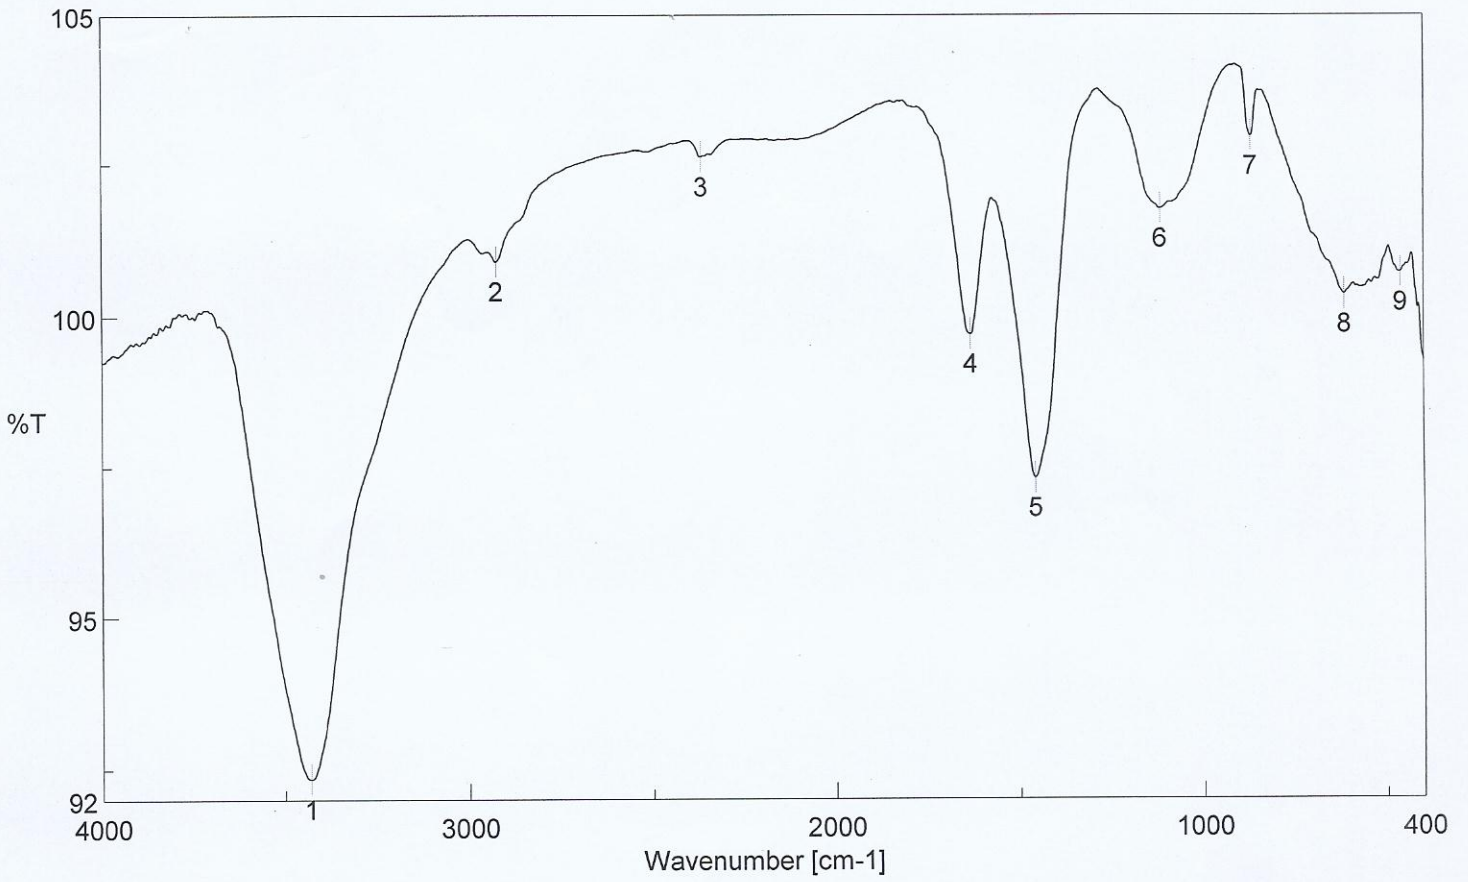

[Comments]

Sample name 2  
 Comment 2/2019  
 User IR  
 Division IR  
 Company MAC

[ Result of Peak Picking ]

| No. | Position | Intensity | No. | Position | Intensity | No. | Position | Intensity |
|-----|----------|-----------|-----|----------|-----------|-----|----------|-----------|
| 1   | 3430.74  | 92.3423   | 2   | 2925.48  | 100.909   | 3   | 2366.23  | 102.631   |
| 4   | 1633.41  | 99.7074   | 5   | 1458.89  | 97.3174   | 6   | 1118.51  | 101.781   |
| 7   | 870.703  | 102.977   | 8   | 615.181  | 100.371   | 9   | 462.832  | 100.732   |

*Handwritten signature and date:*  
 2/19/19

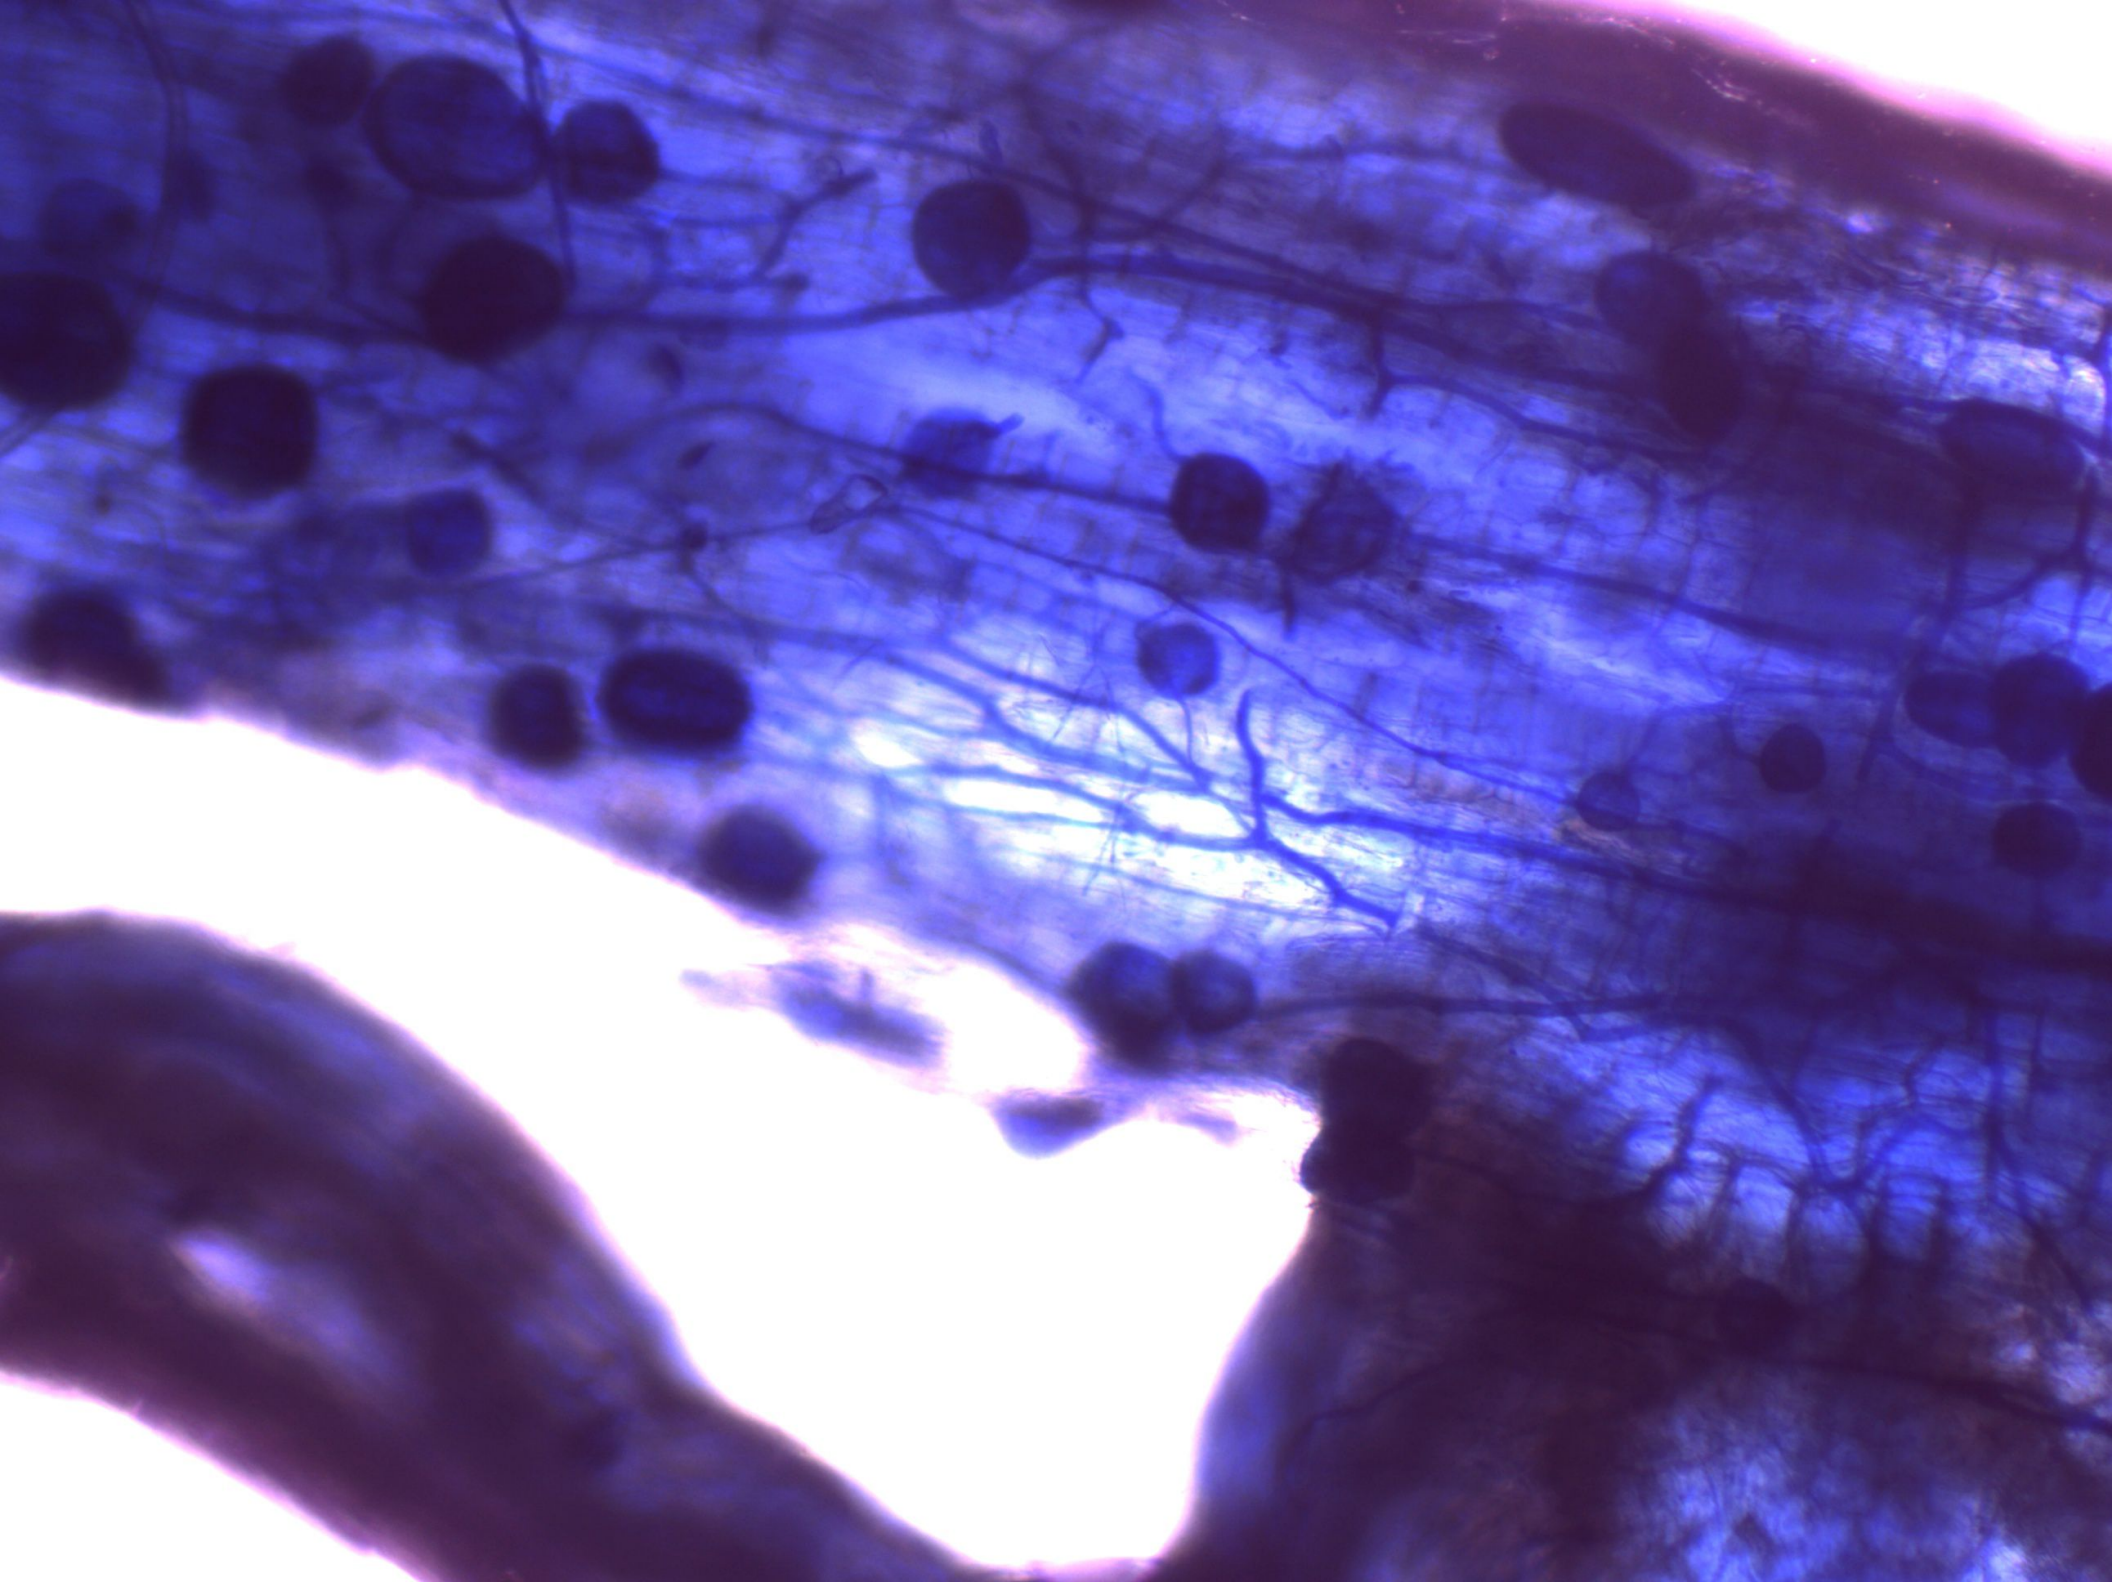

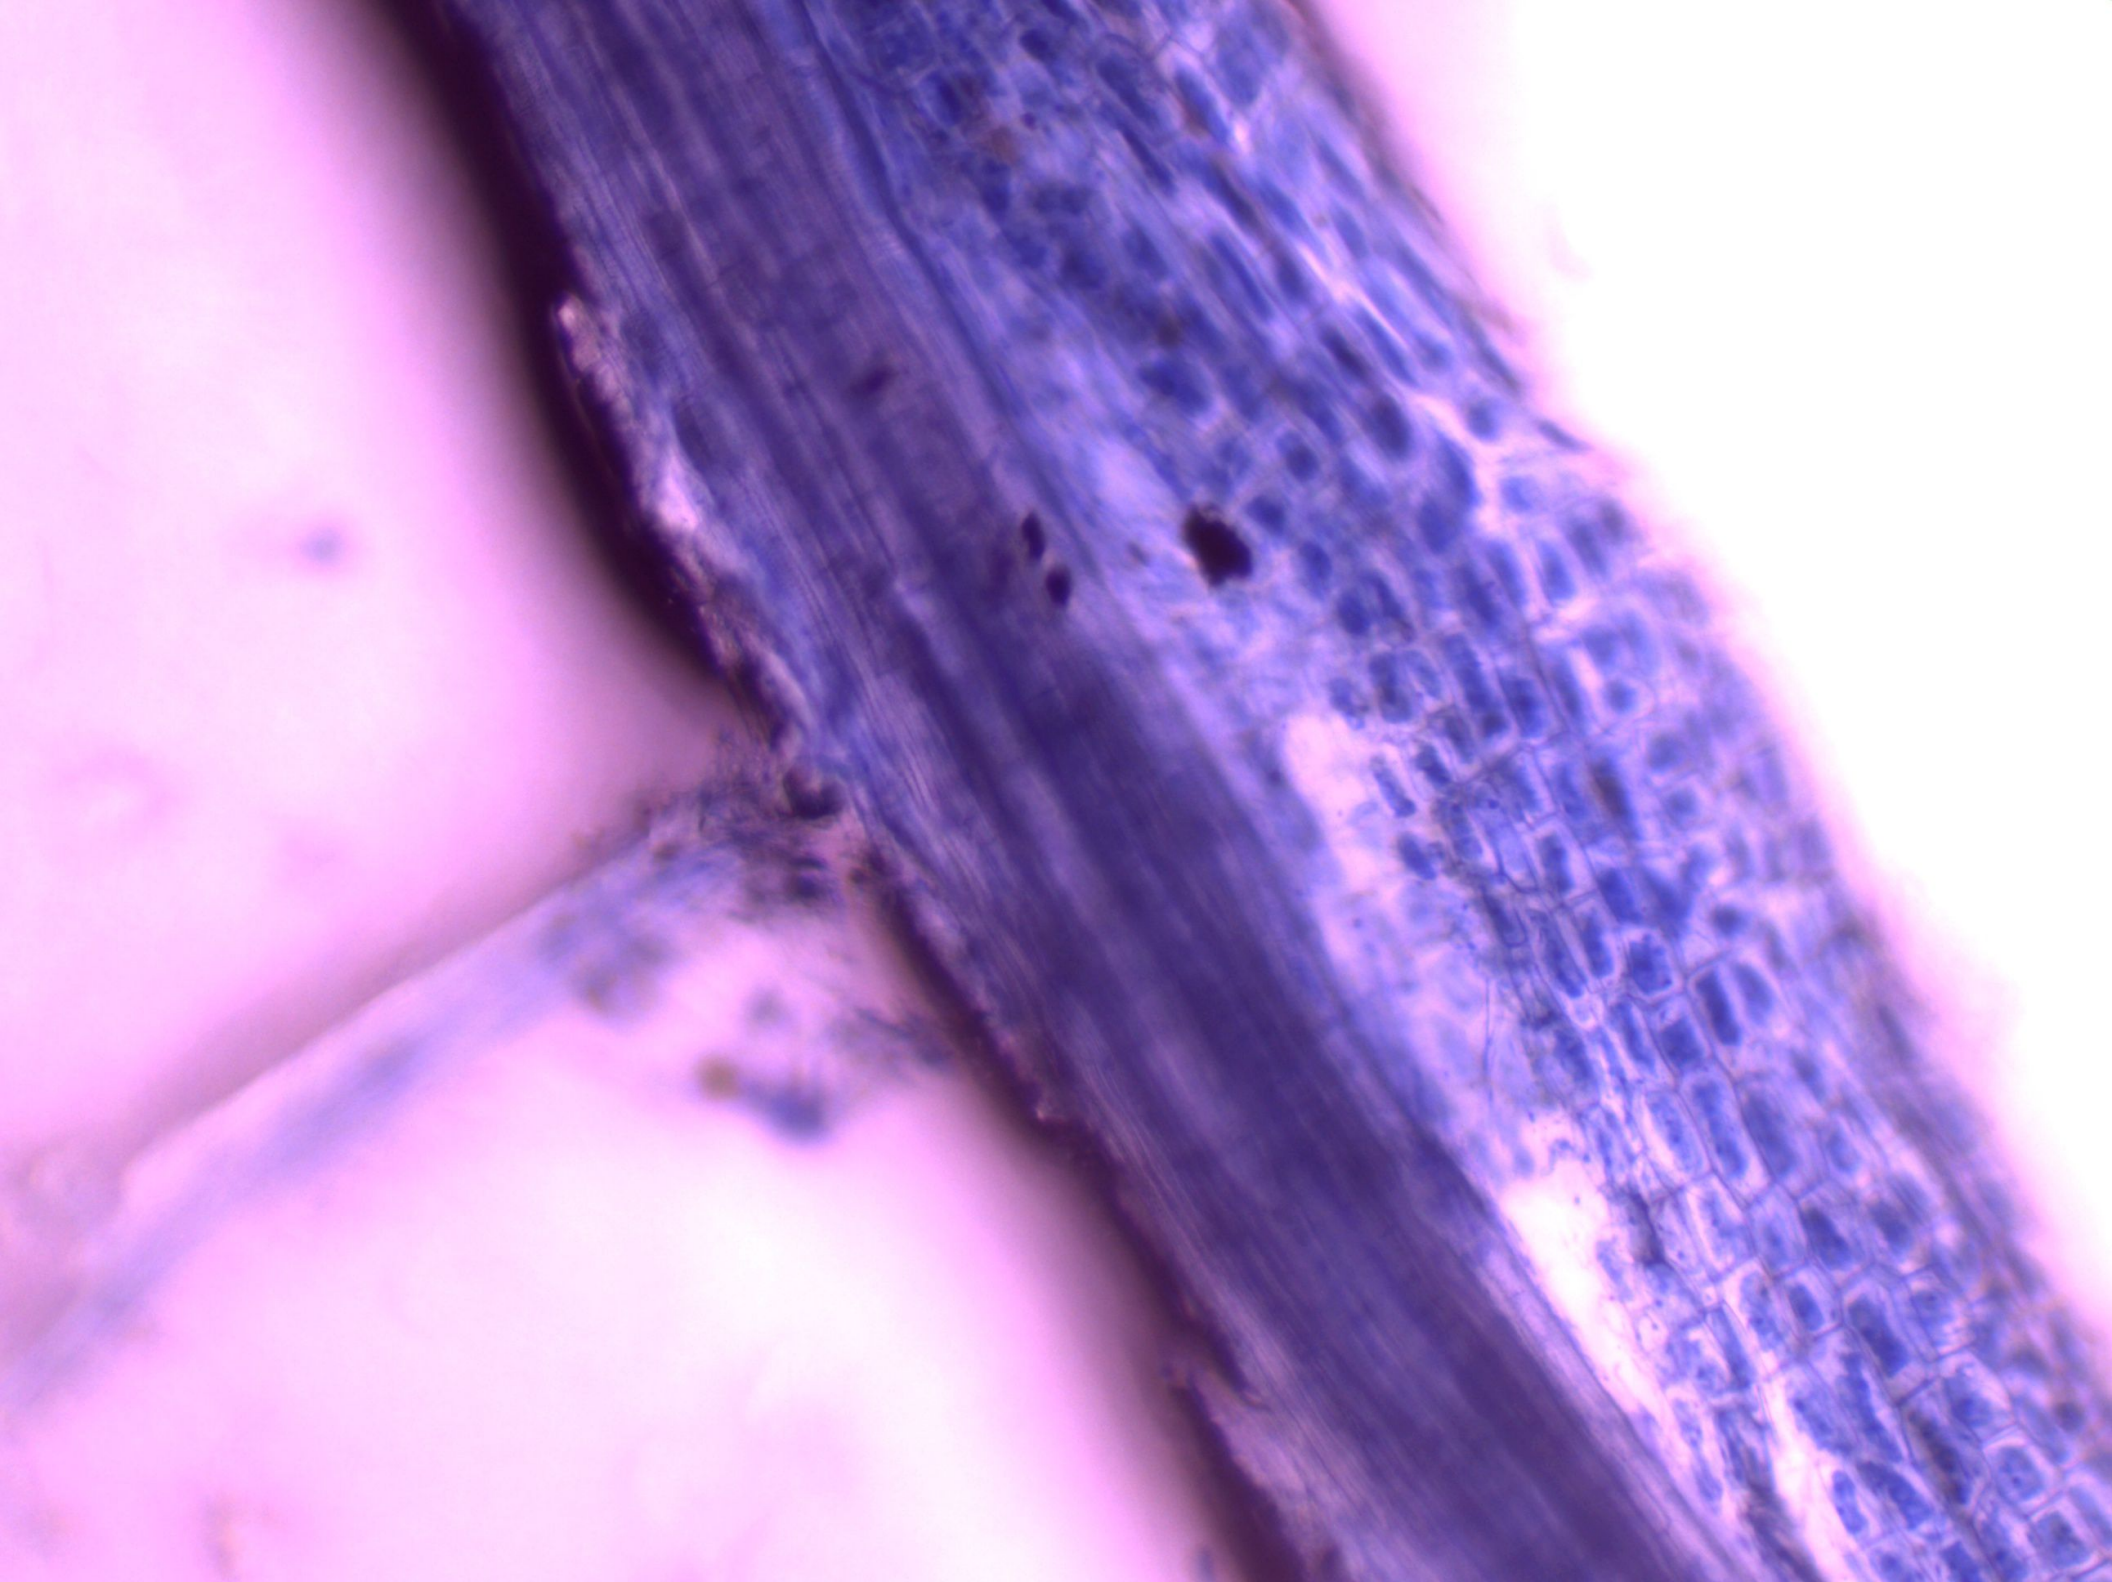

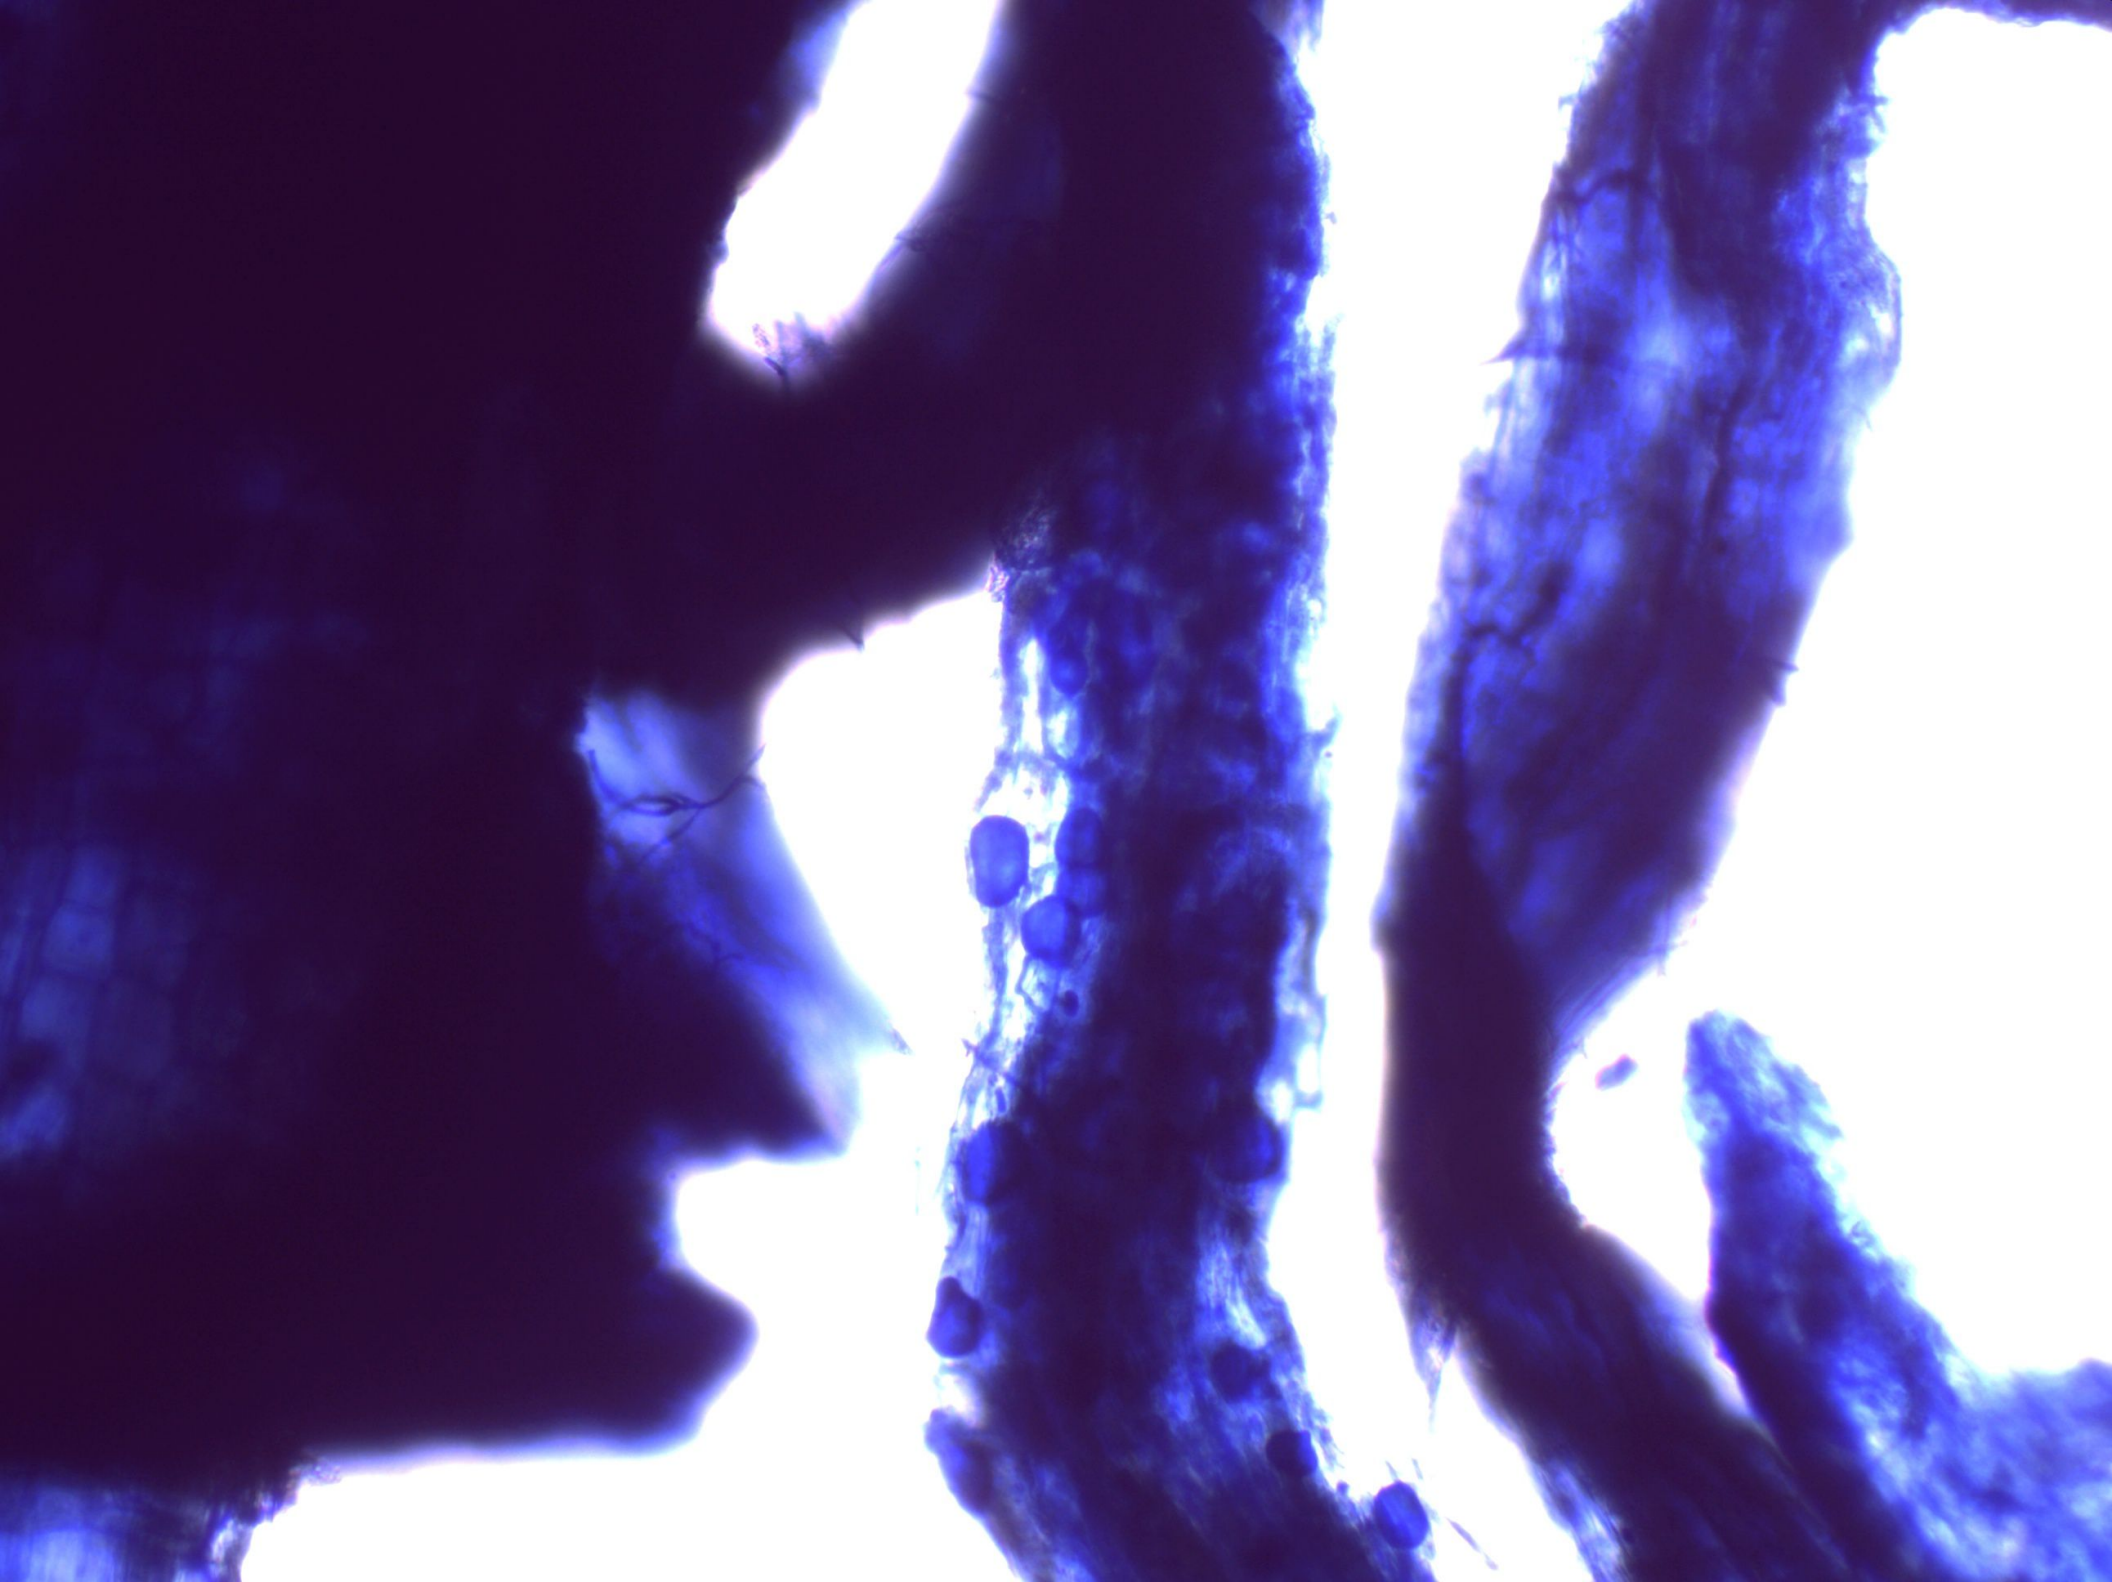



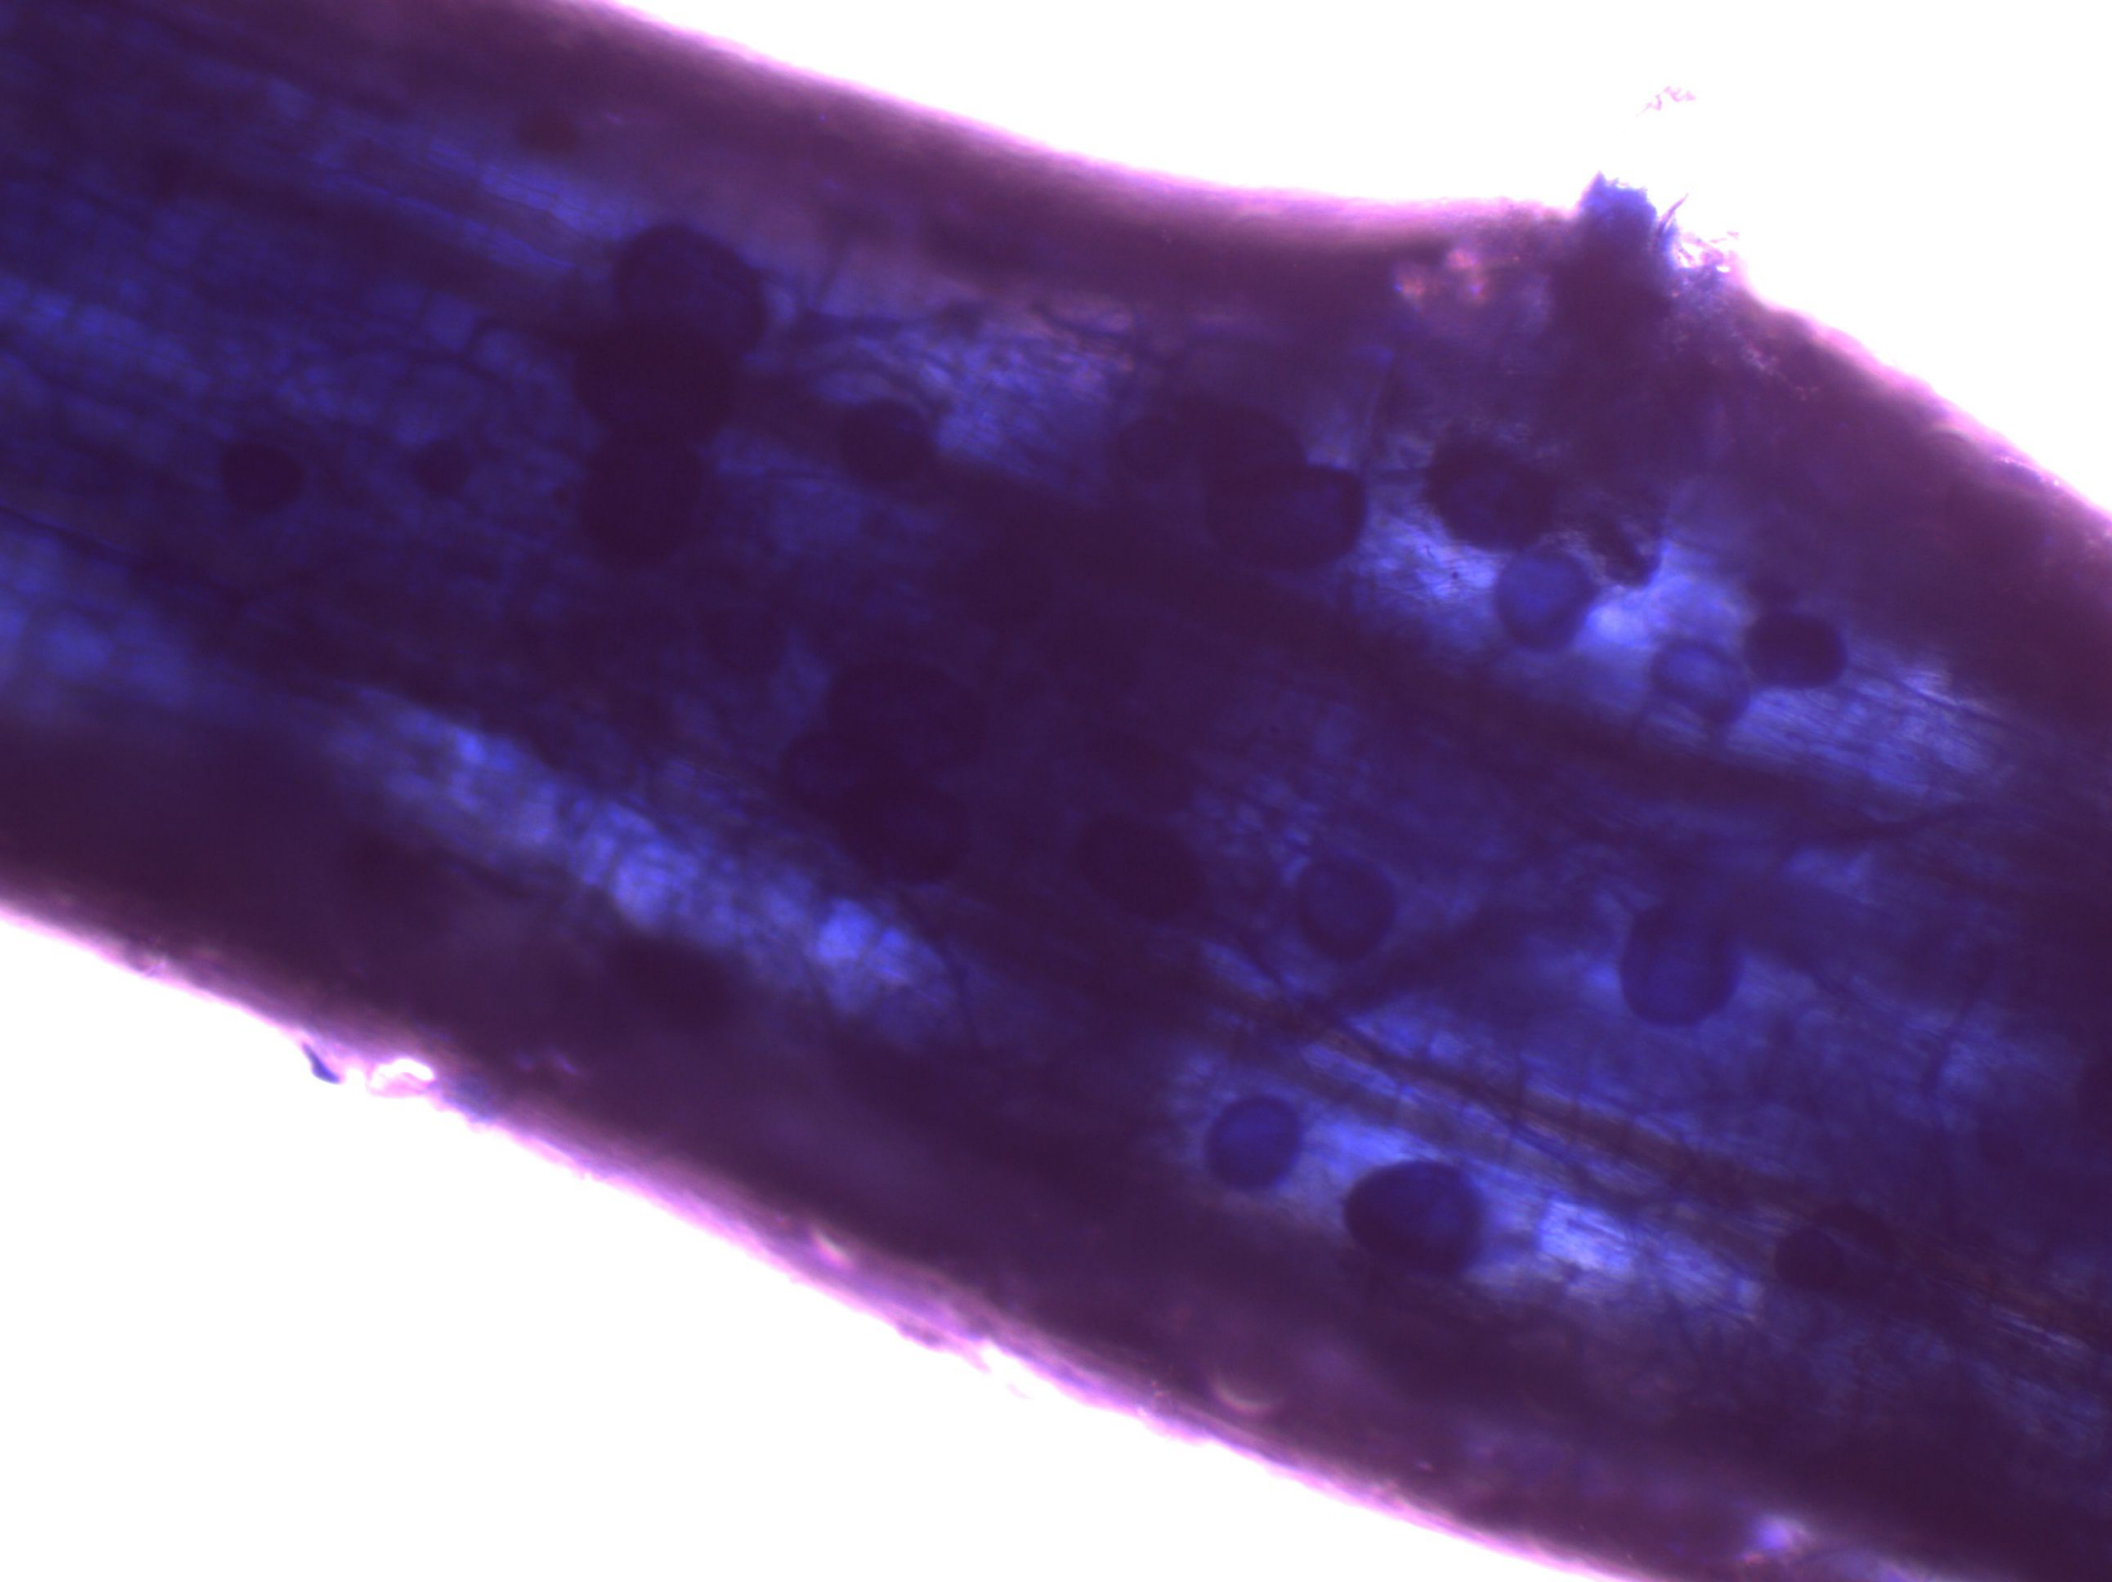

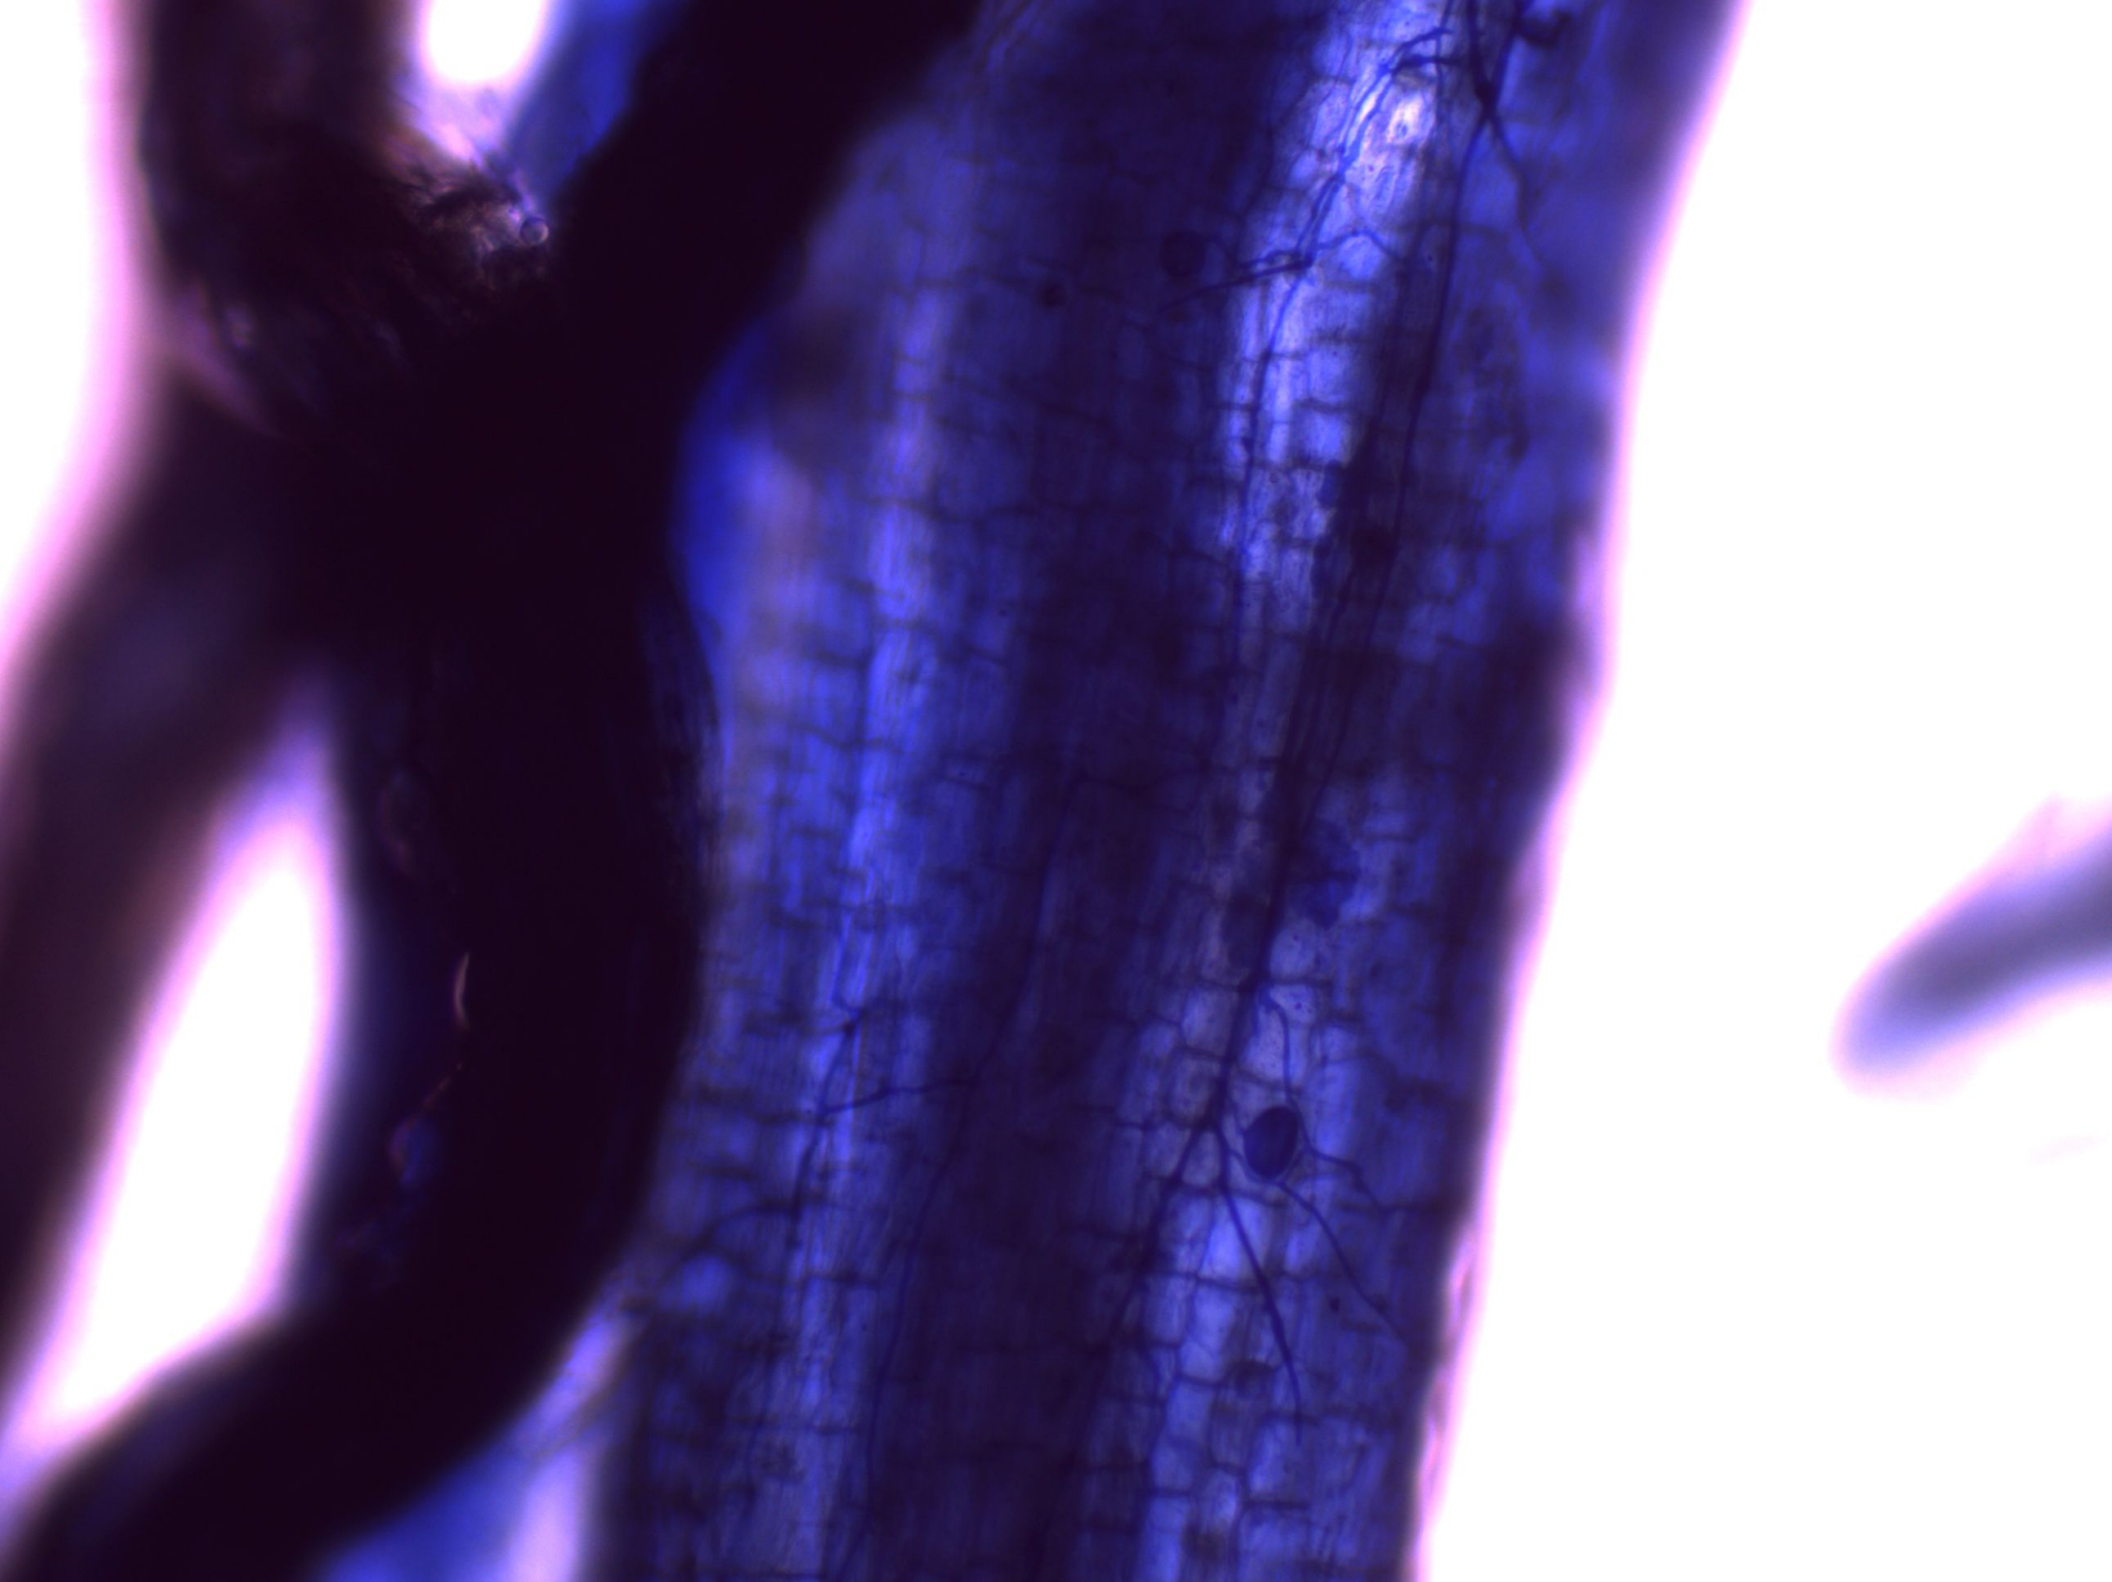

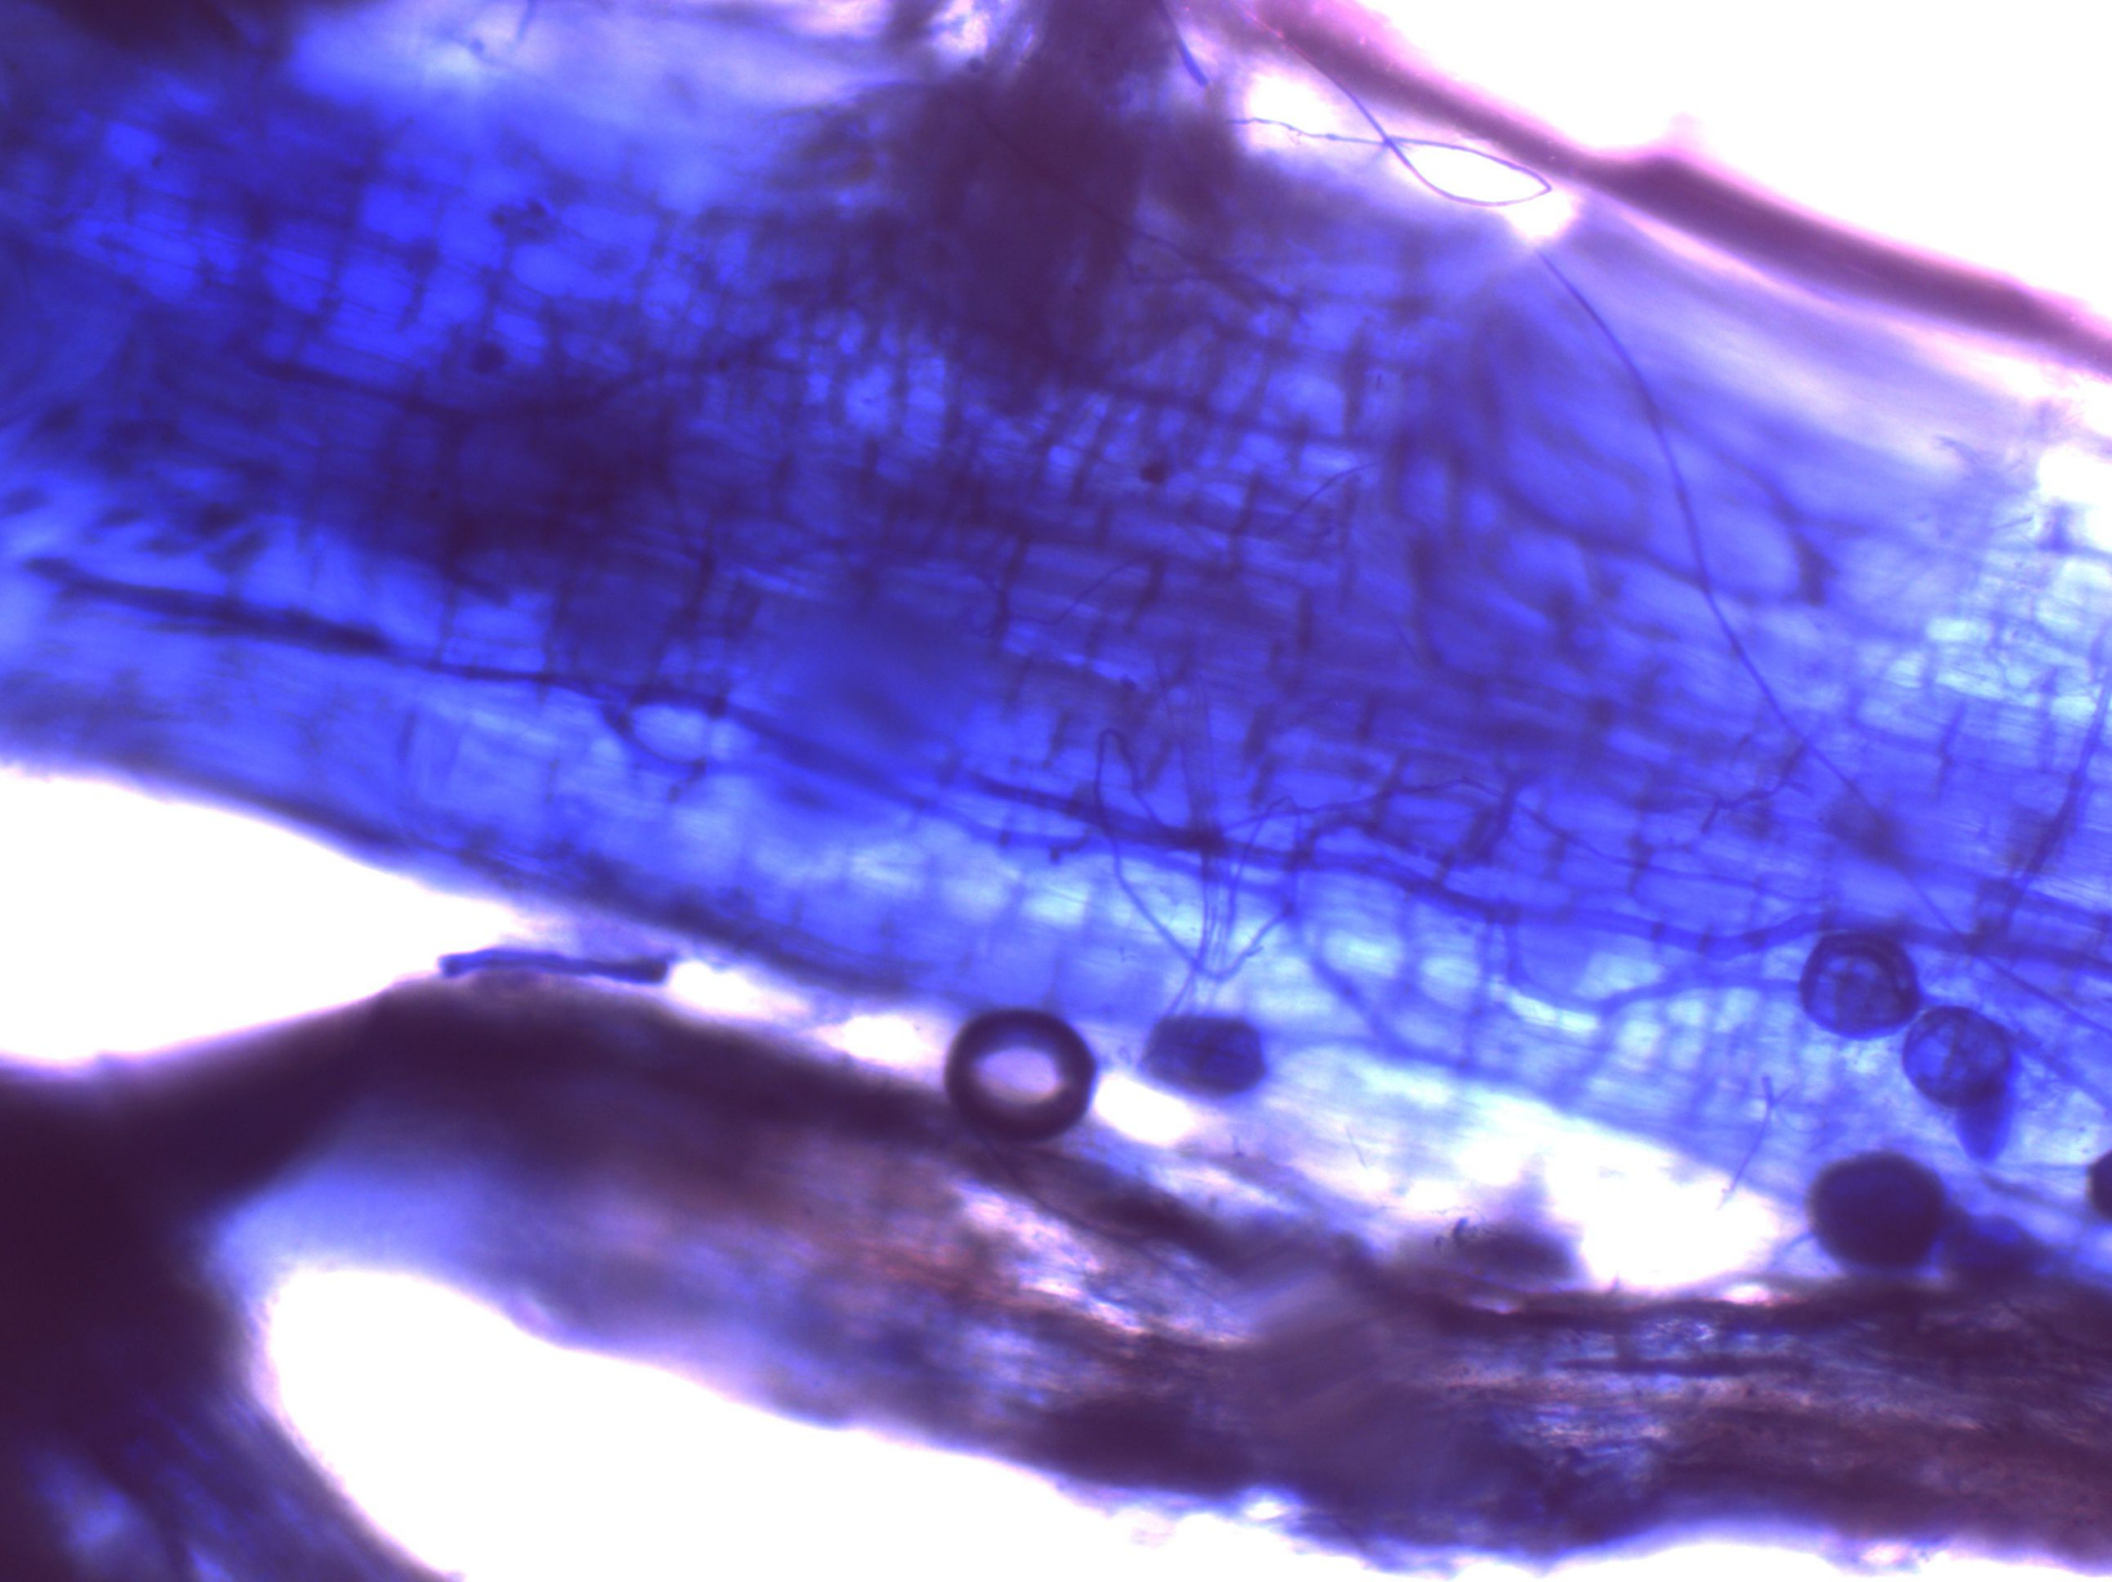

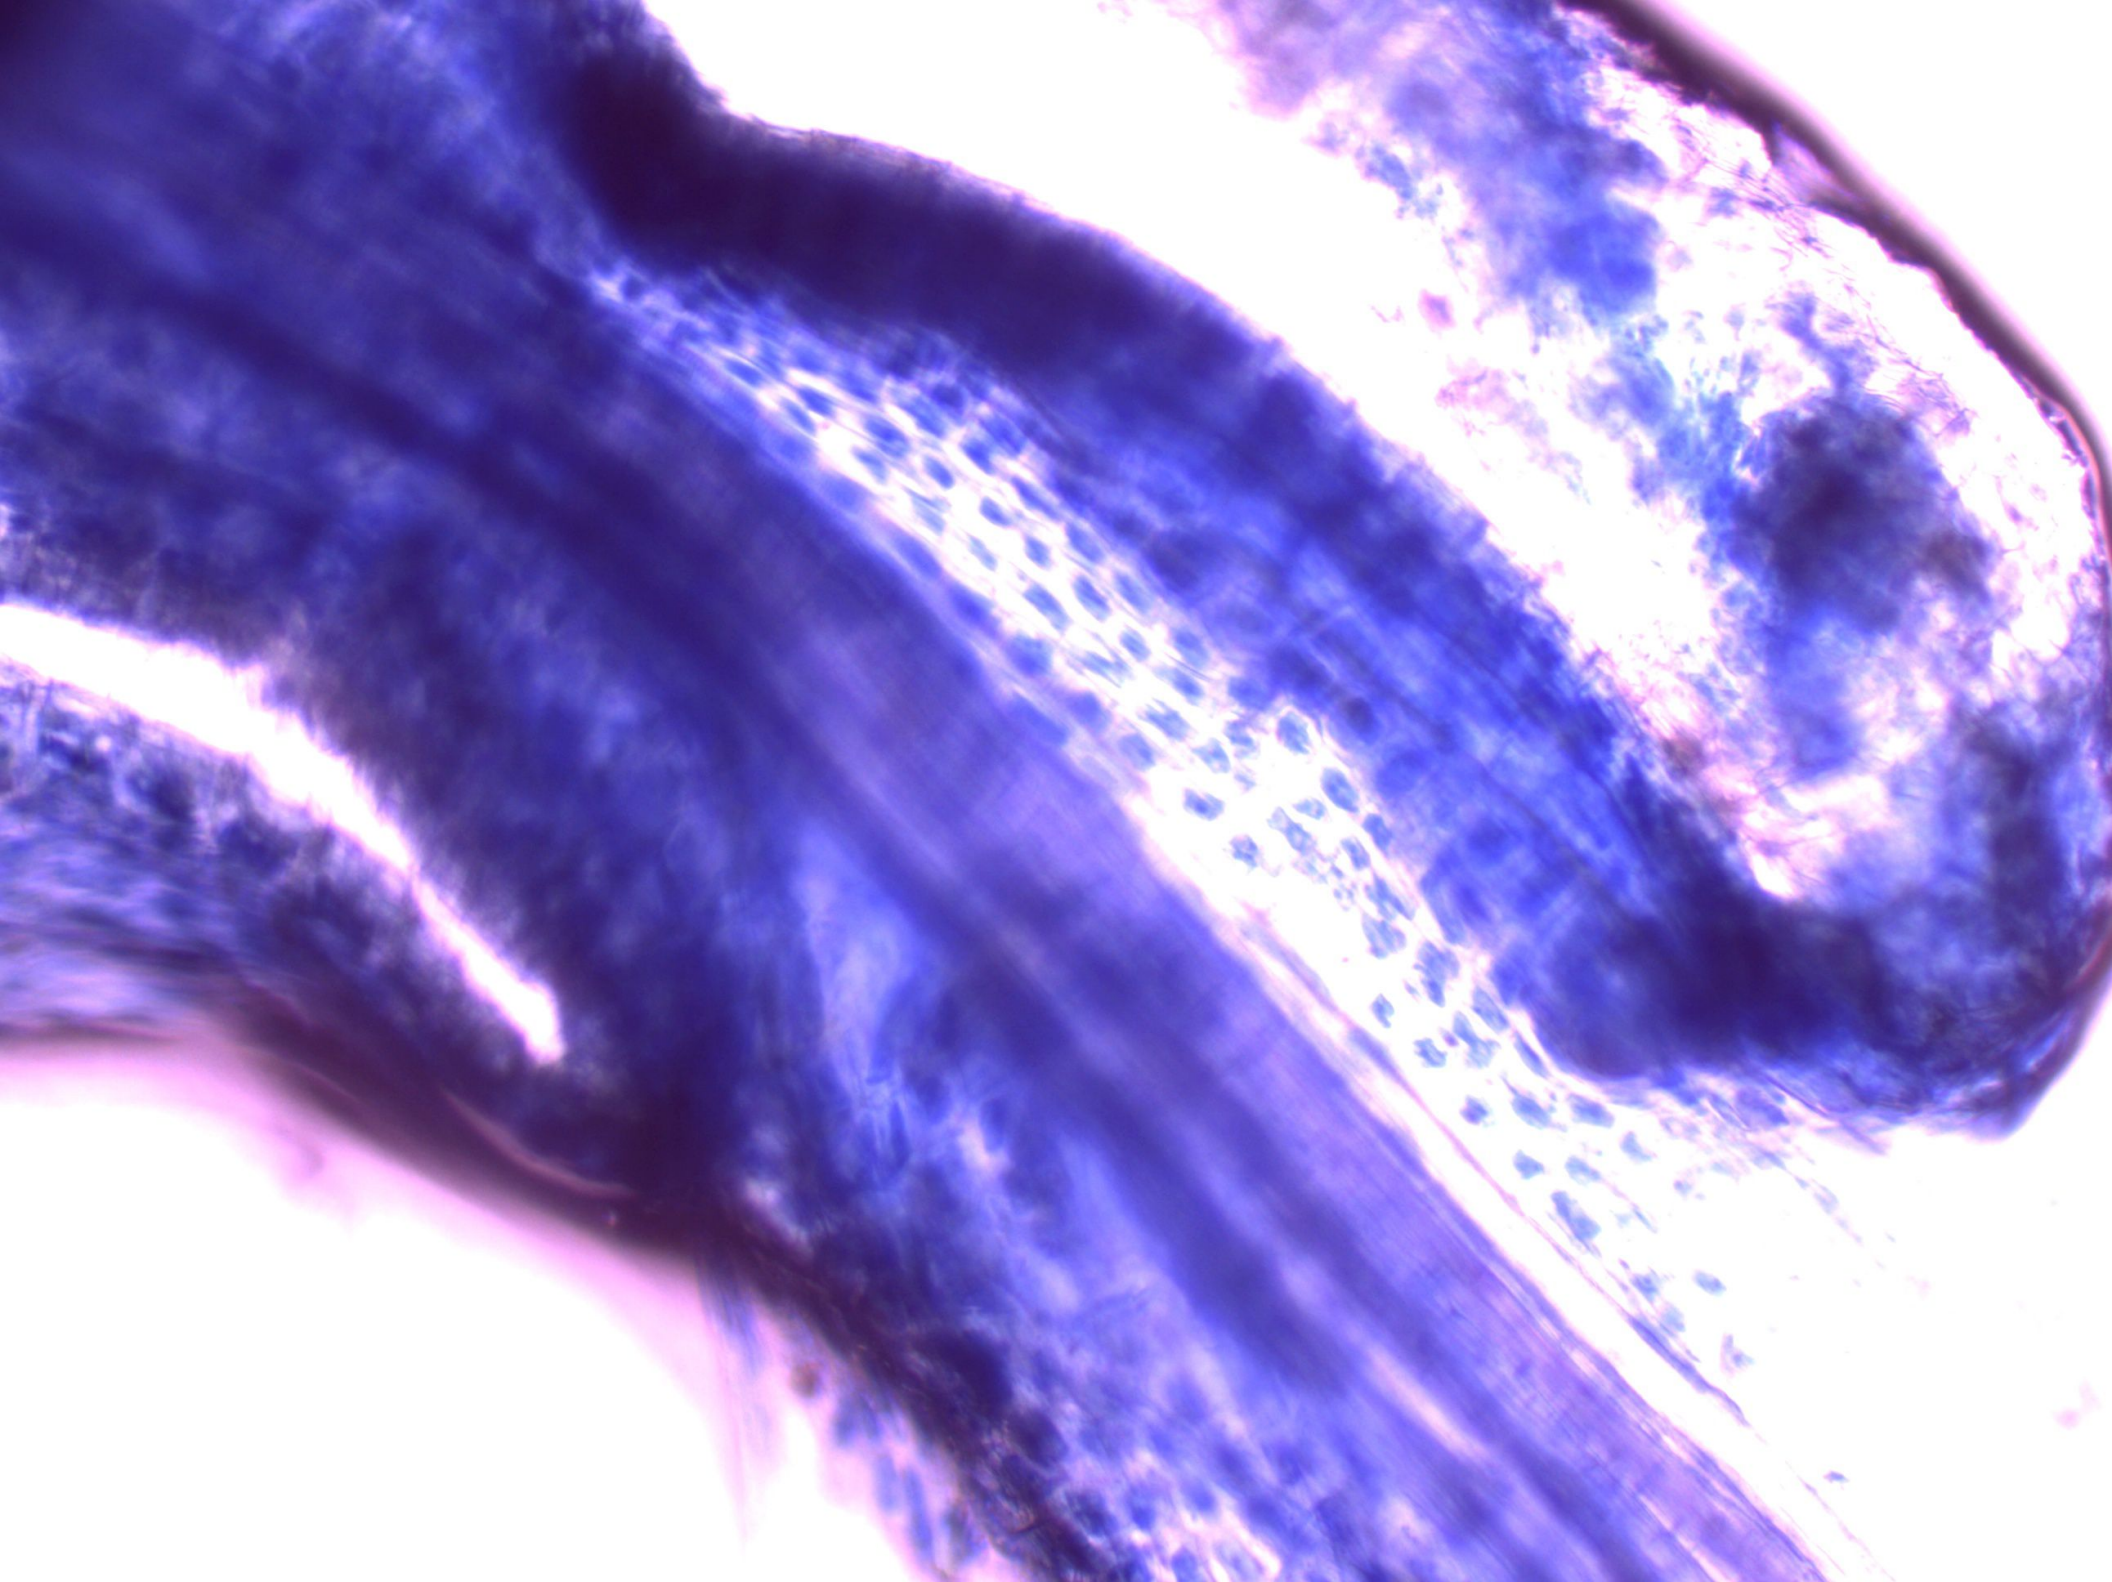

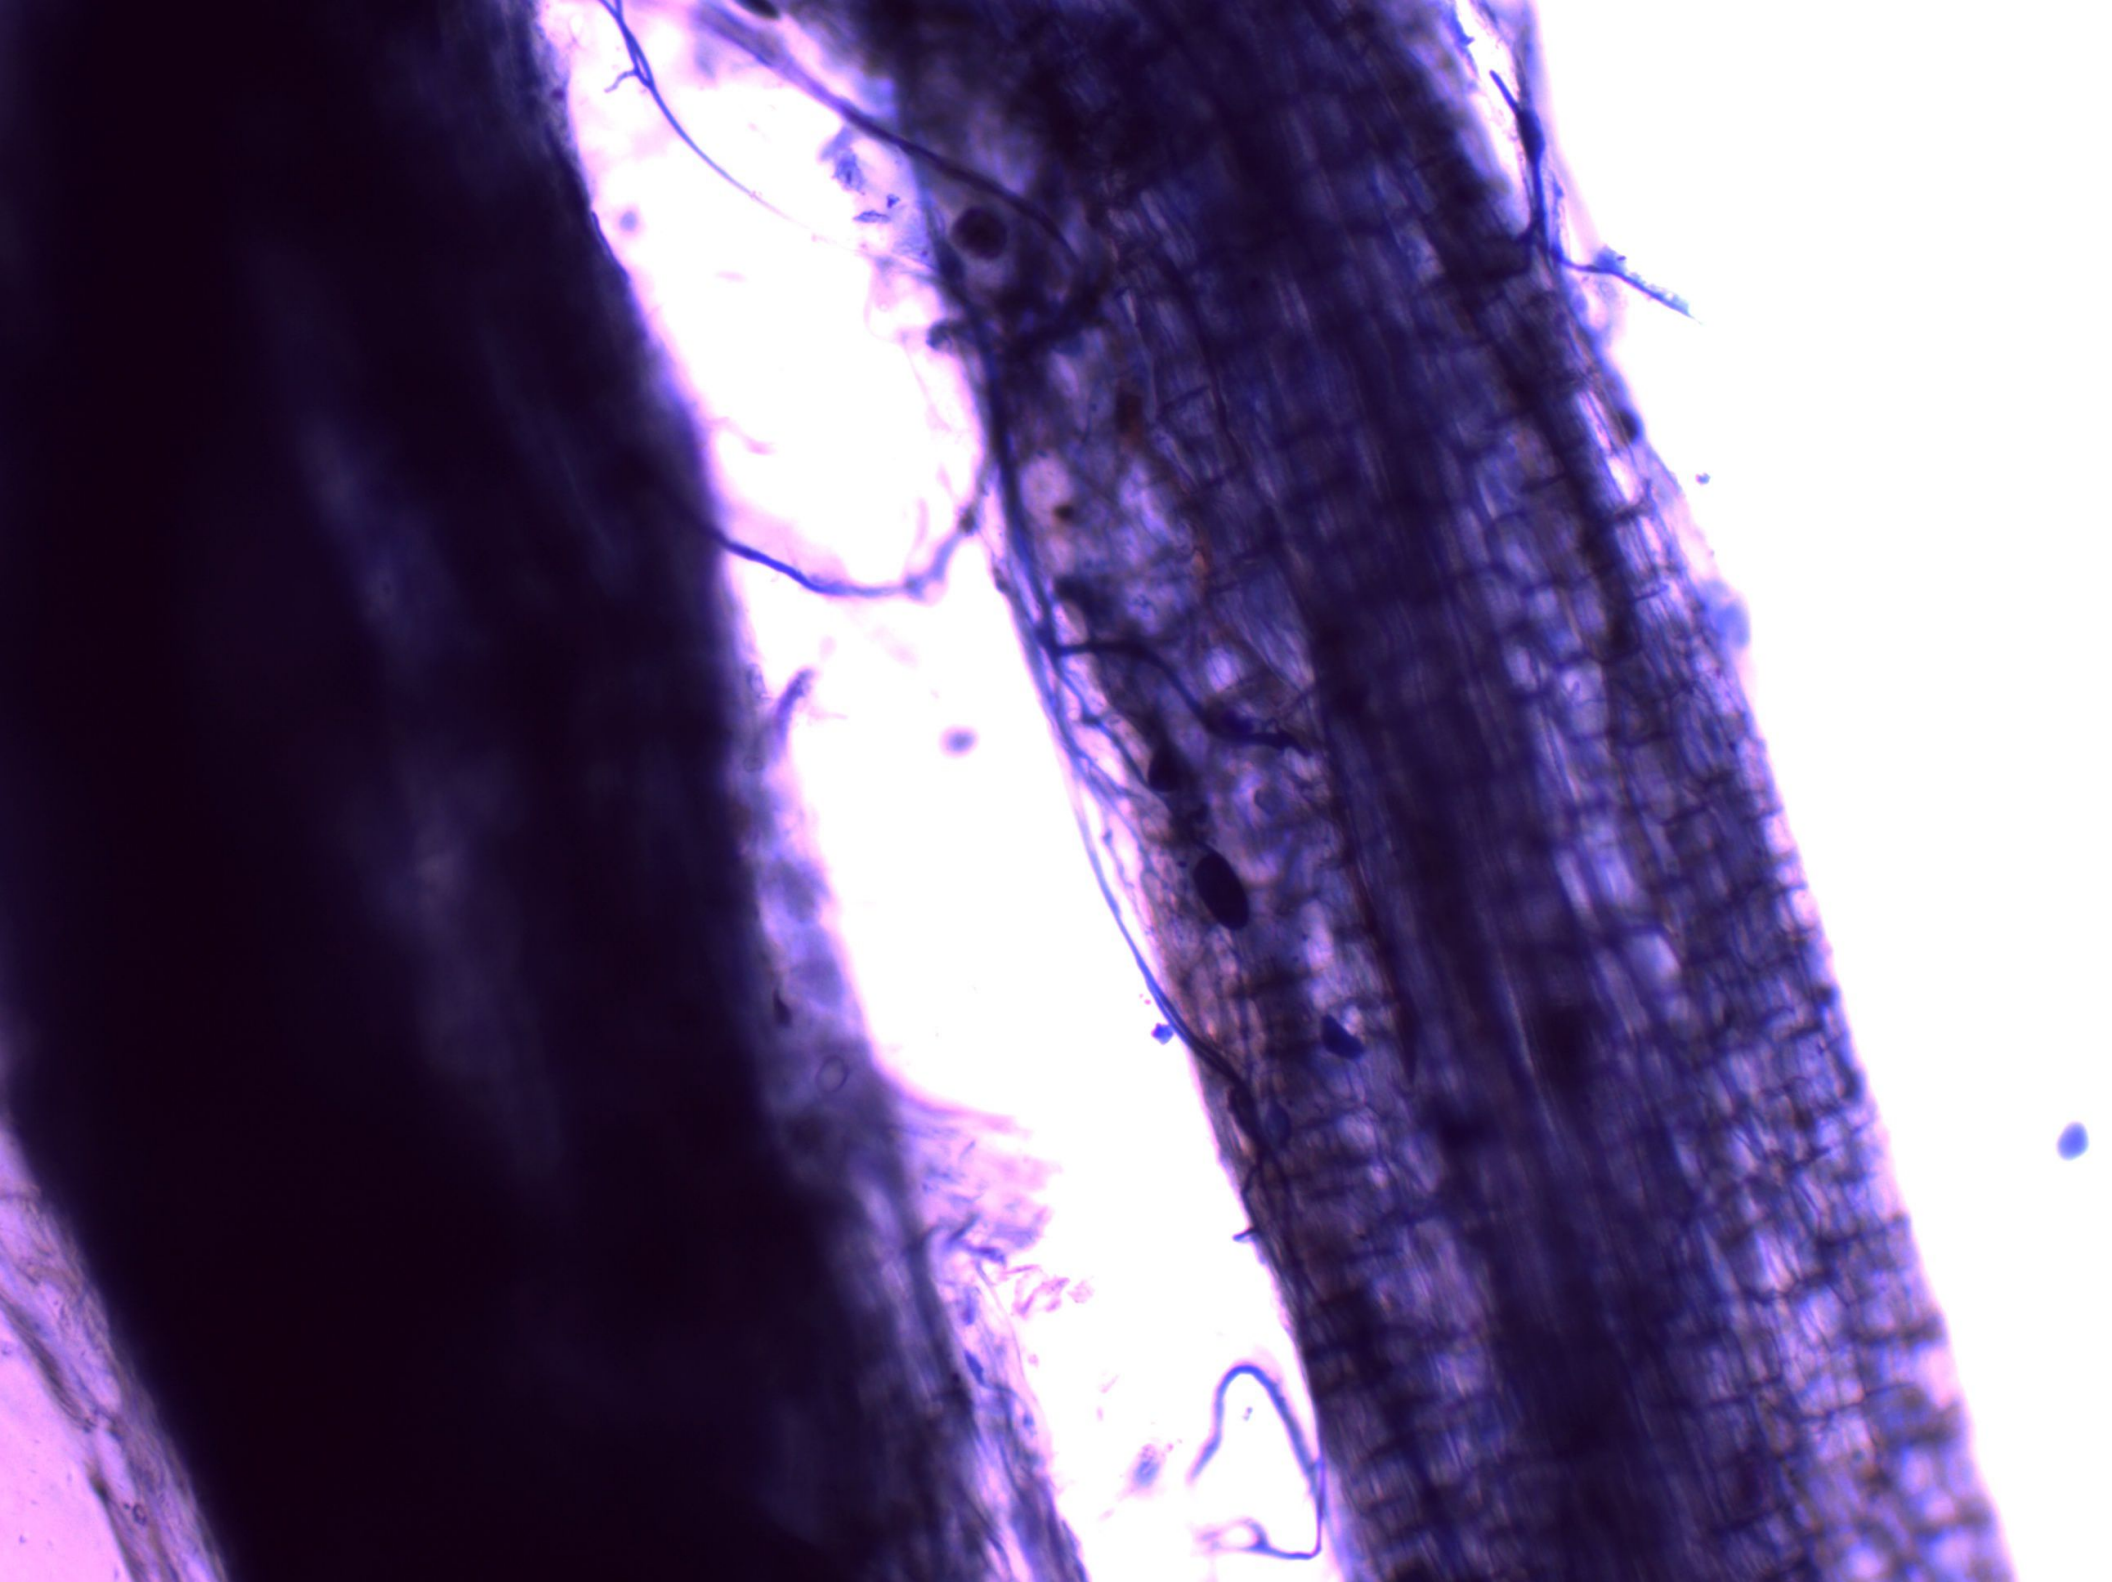

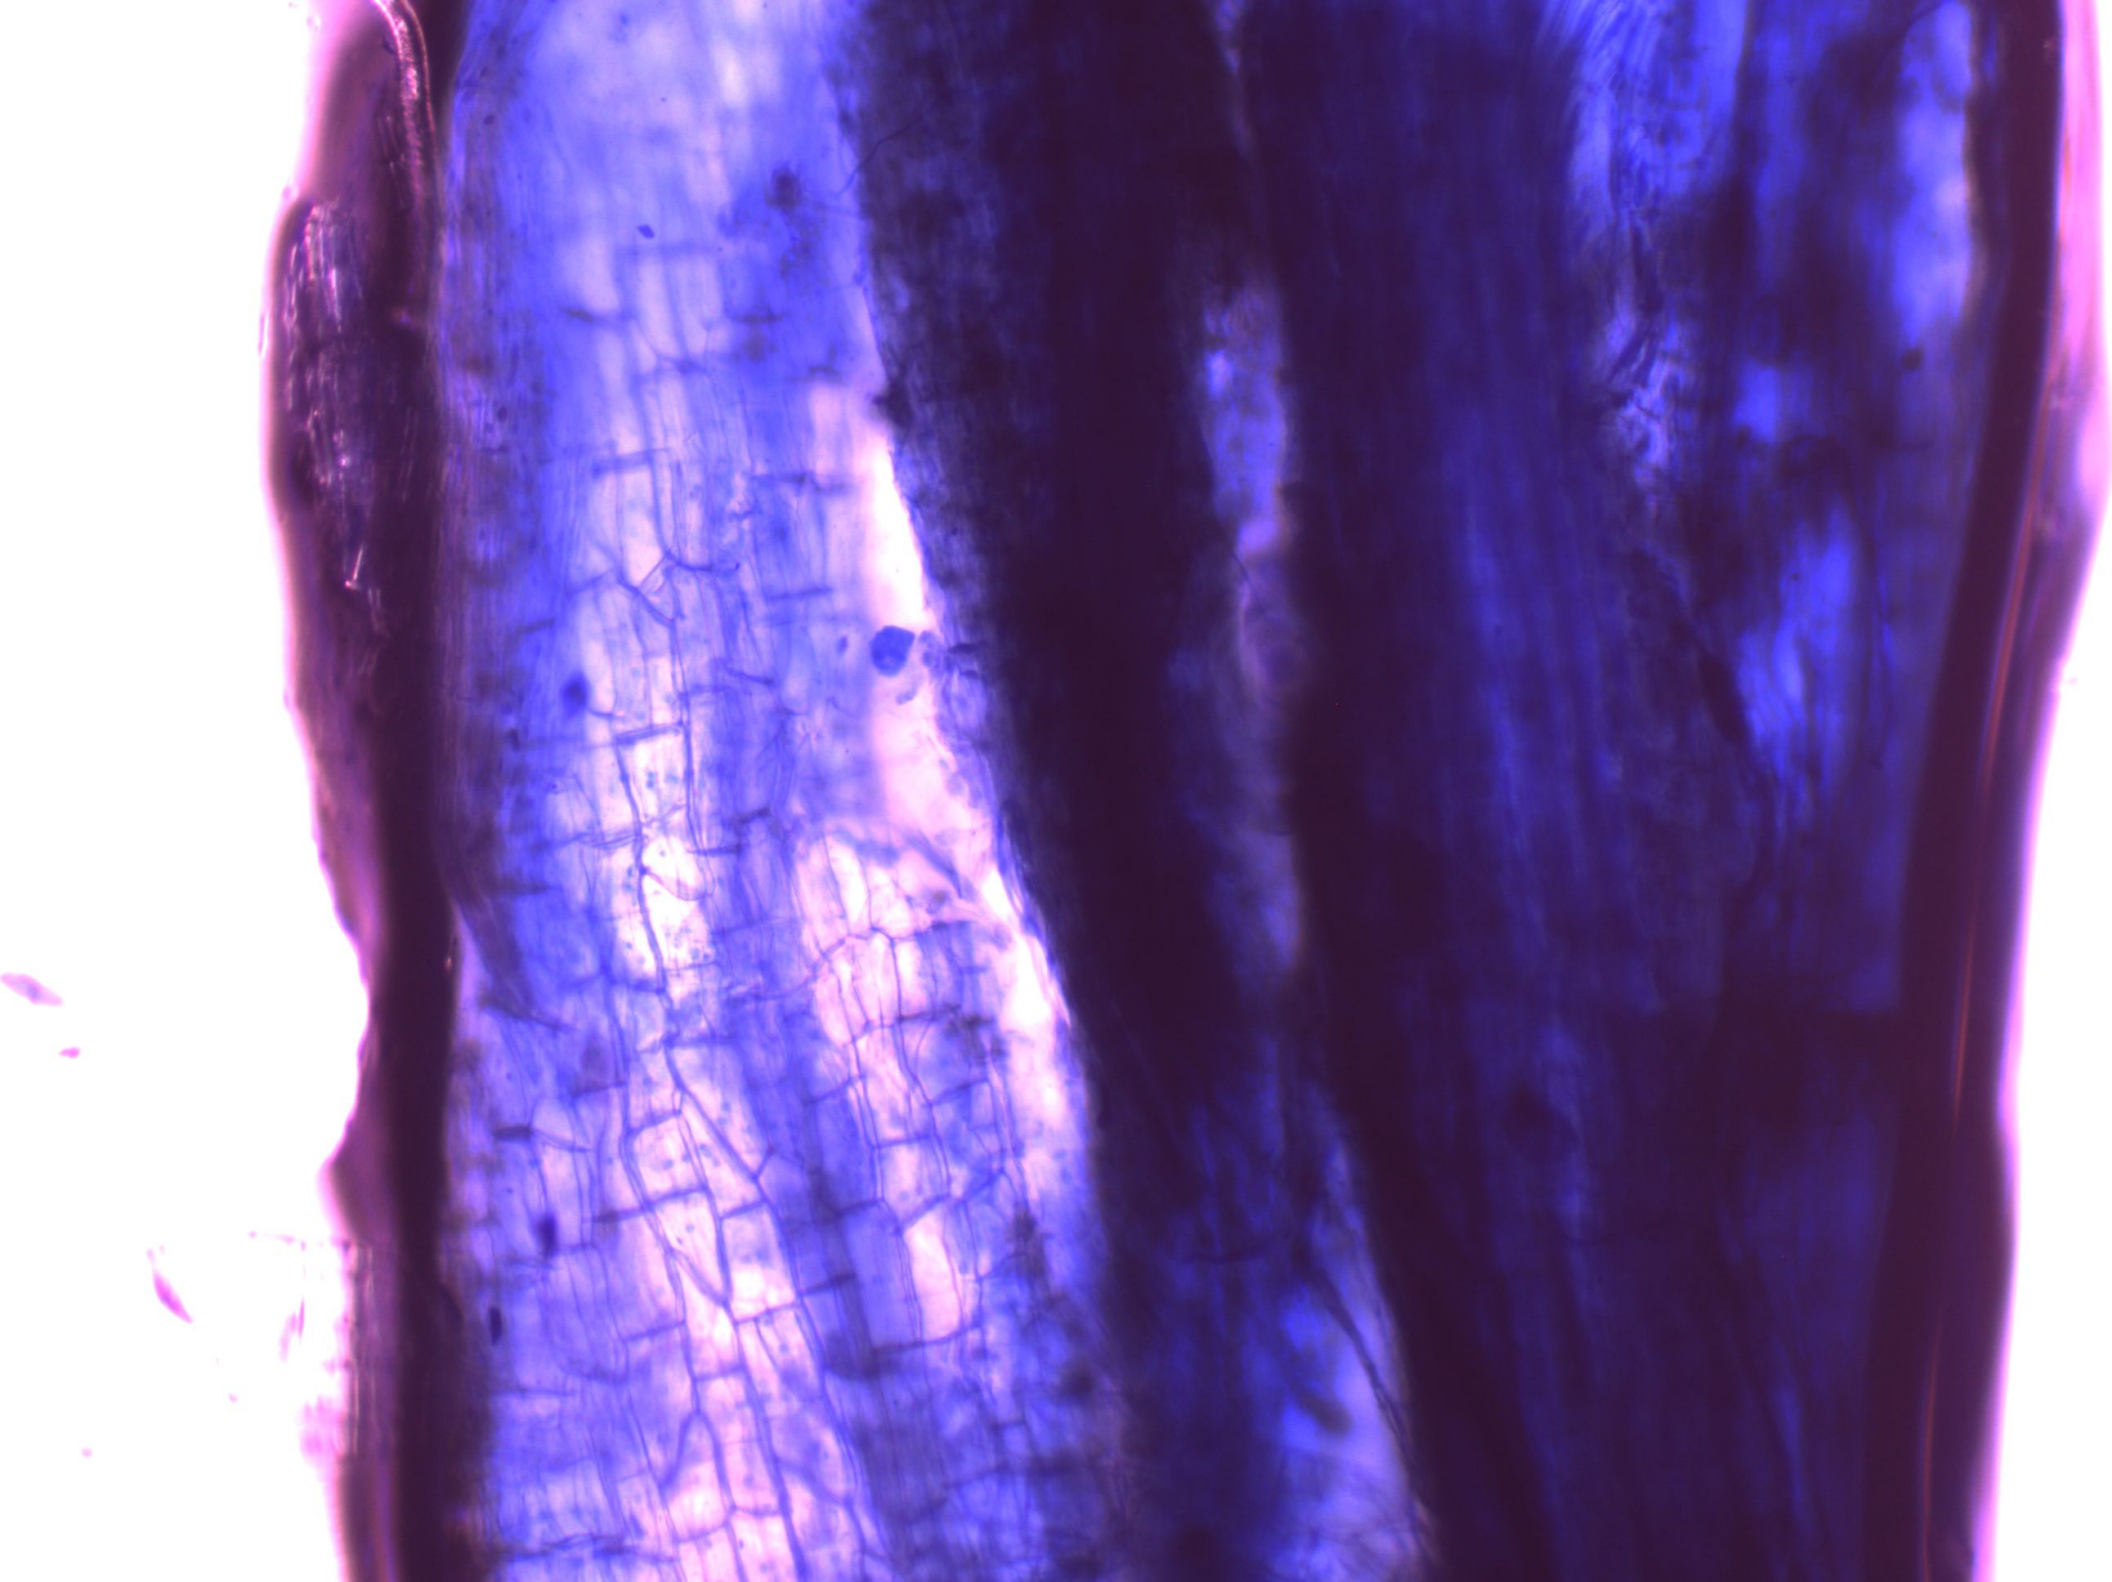

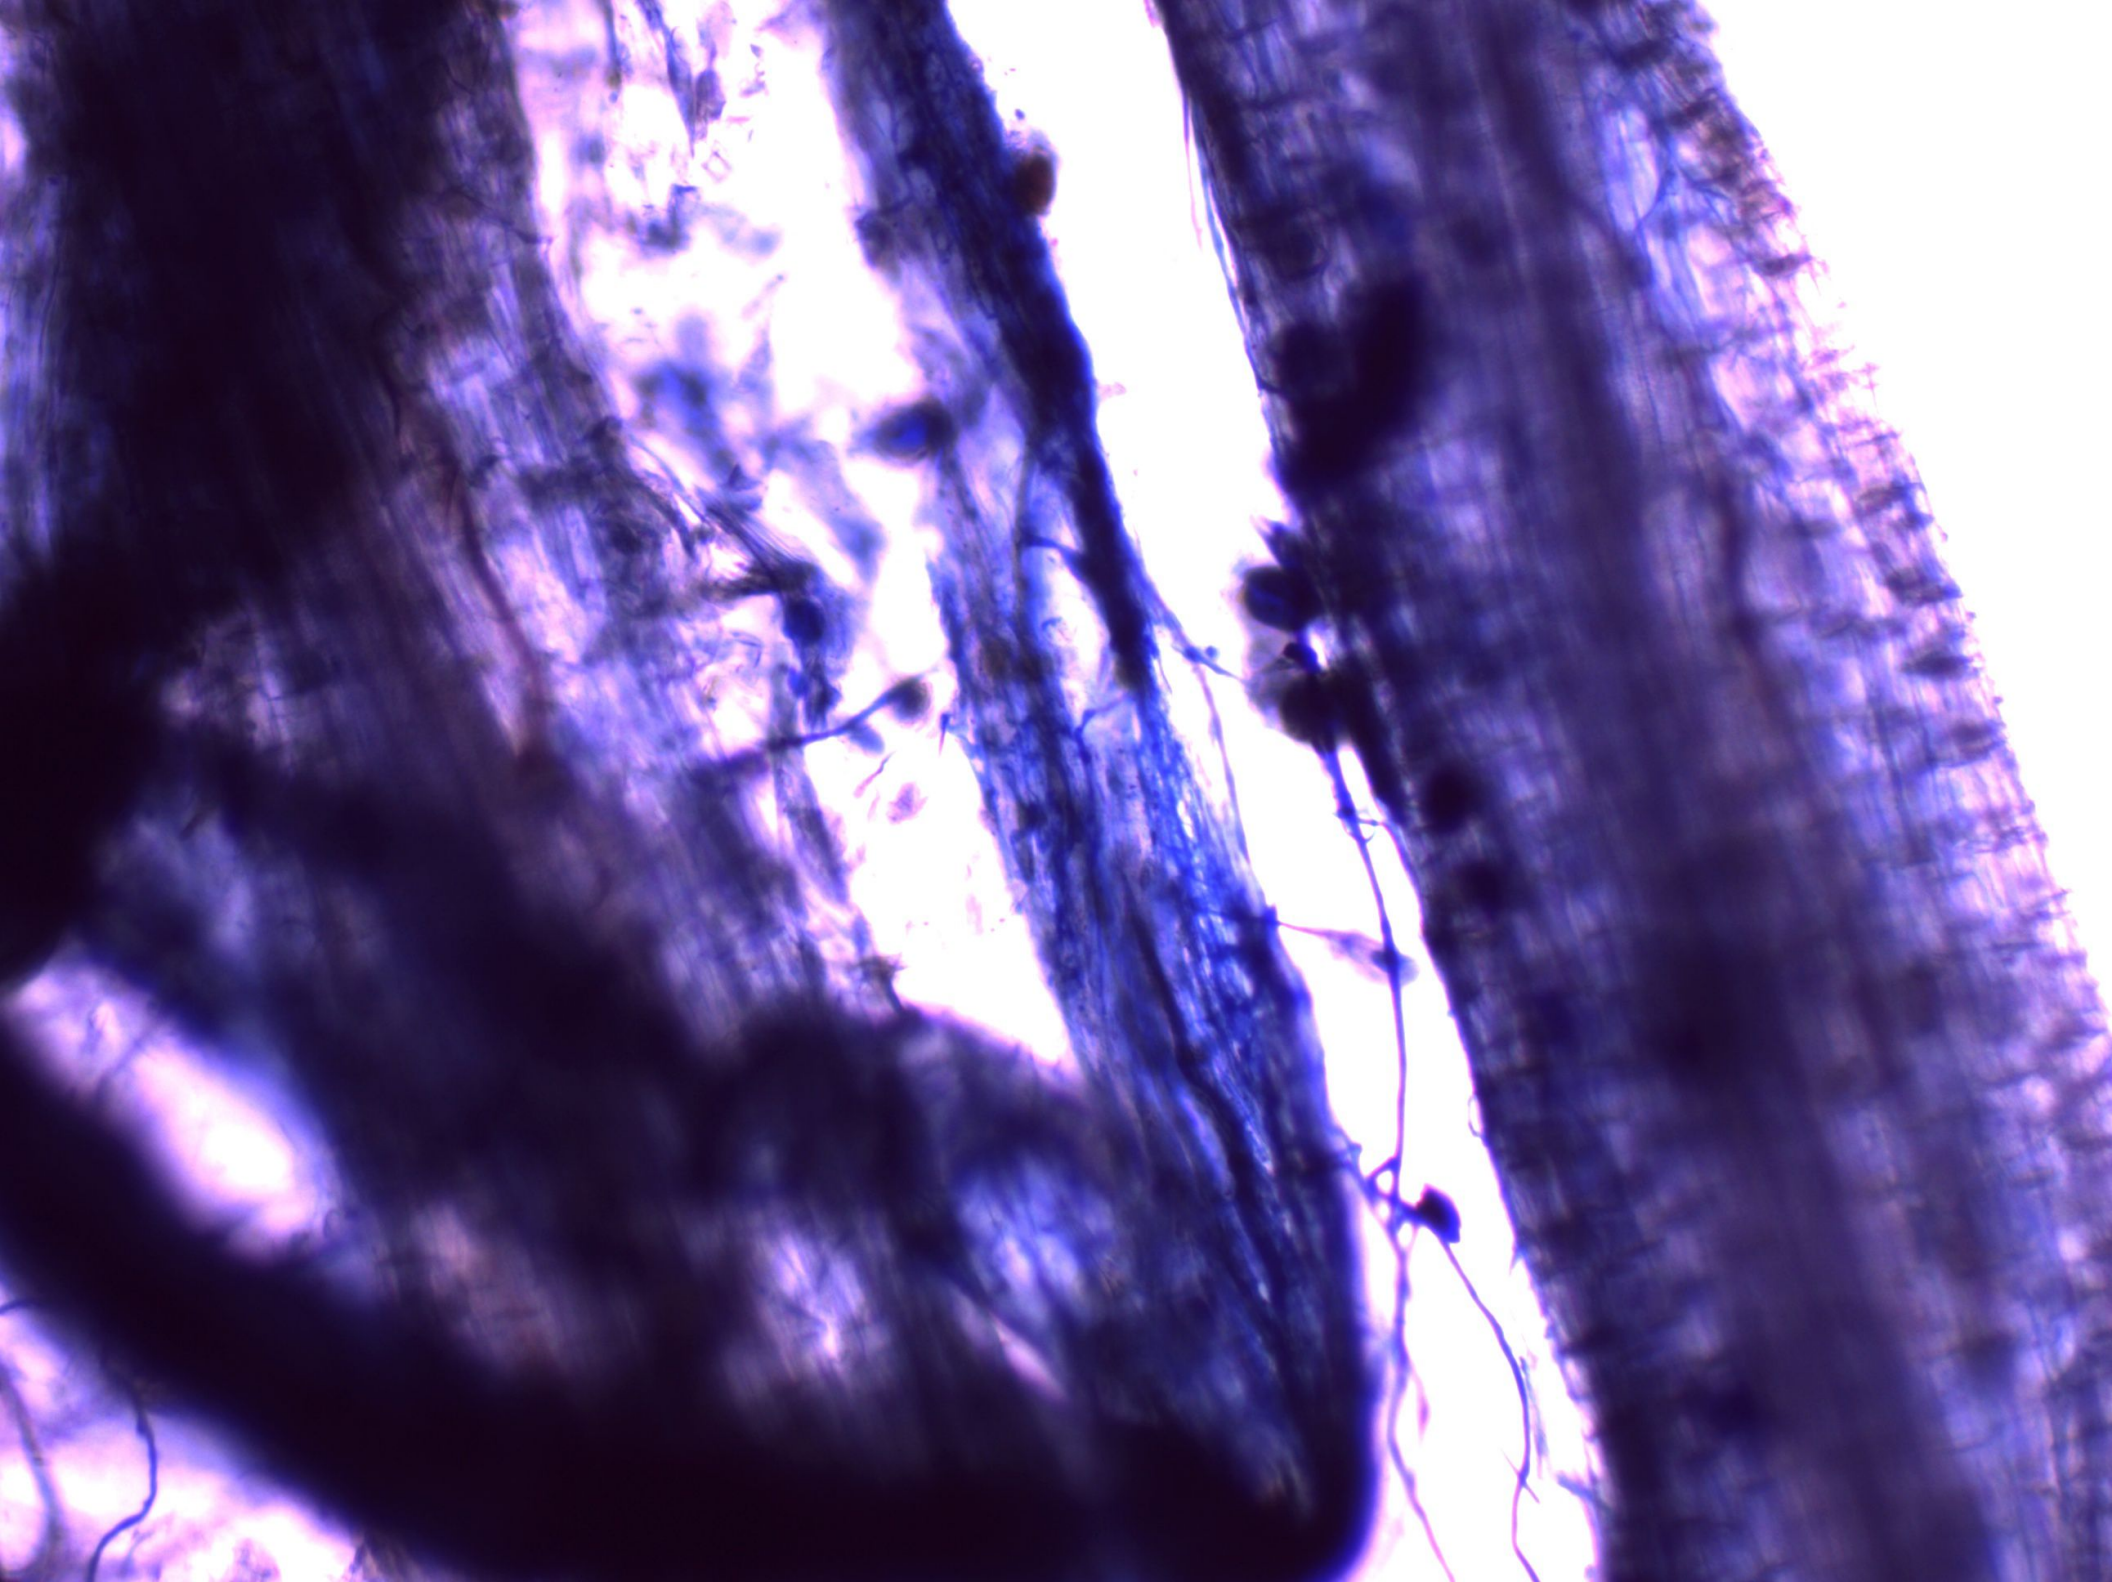

100 100 100 100 100 100 100 100

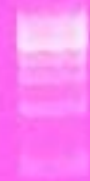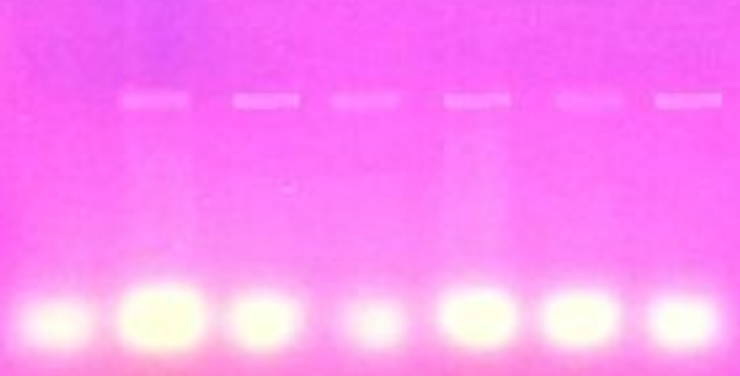

4



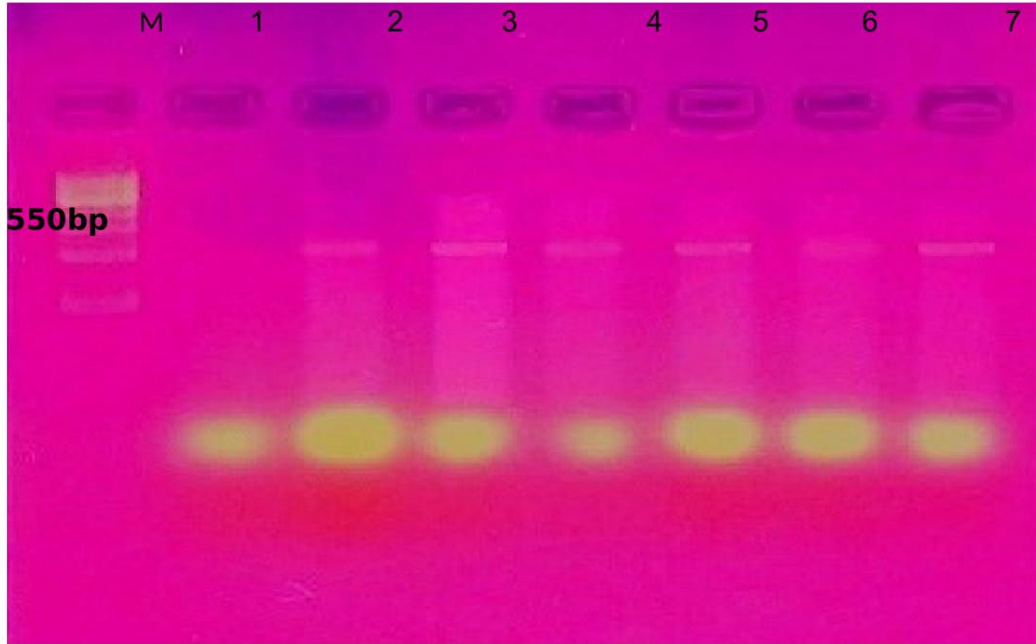

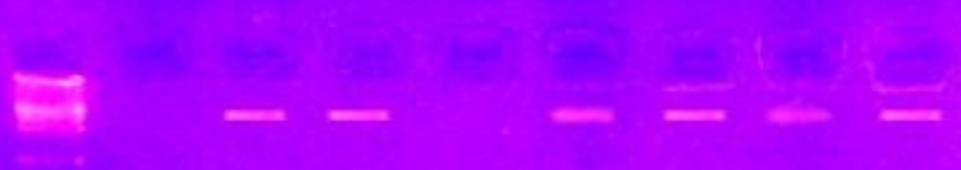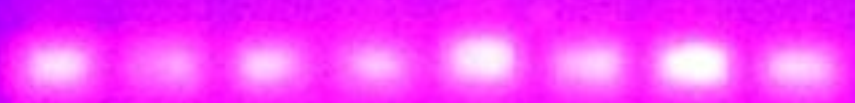

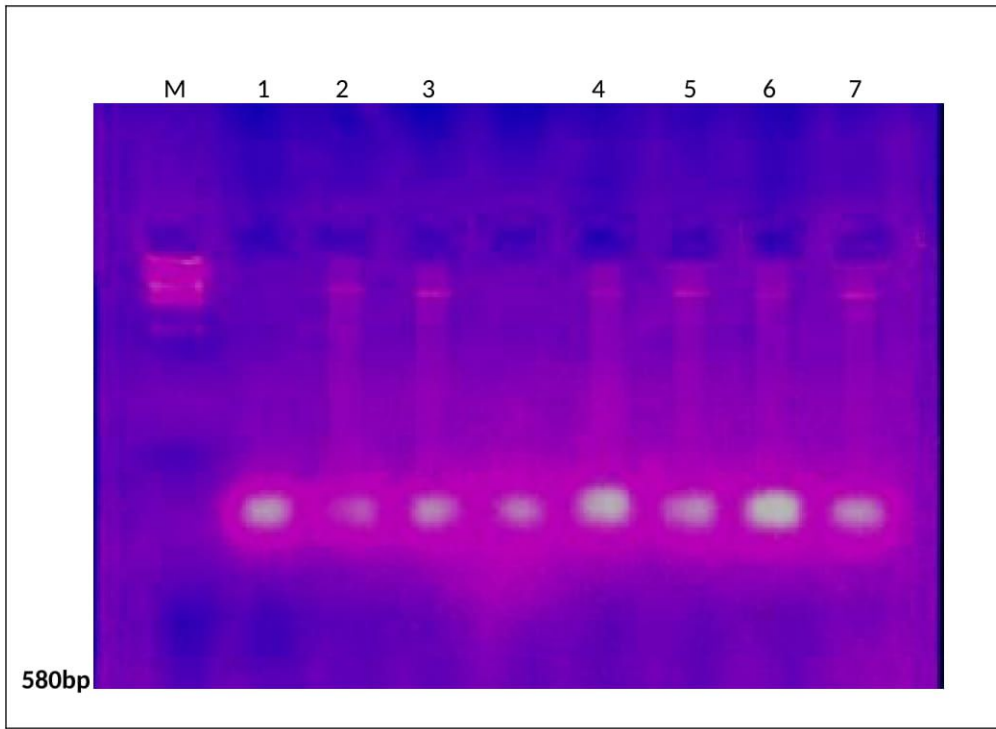

Supplement: pone.0235355.s004.pdf [file pone.0235355.s004.pdf]
